# Supplementary material for: Distributed coding of duration in rodent prefrontal cortex during time reproduction
Source: eLife. 2021 Dec 23;10:e71612. doi: 10.7554/eLife.71612 (PMC8786316; doi:10.7554/eLife.71612)
Supplement: Figure 1—source data 2. [file elife-71612-fig1-data2.csv]

Subject	Session	Virtual speed (m/s)	Running speed (m/s)	Reaction time vs. Stimulus r	Reaction time vs. Stimulus p	Reaction time vs. Reproduction r	Reaction time vs. Reproduction p	Virtual speed vs. Stimulus r	Virtual speed vs. Stimulus p	Virtual speed vs. Reproduction r	Virtual speed vs. Reproduction p	Virtual speed vs. Bias r	Virtual speed vs. Bias p	Running speed vs. Stimulus r	Running speed vs. Stimulus p	Running speed vs. Reproduction r	Running speed vs. Reproduction p	Running speed vs. Bias r	Running speed vs. Bias p
10526	1	0.3479944278364039	0.2920704584302832	-0.21412377868865076	0.1905553128323311	0.08942761902177902	0.5882375719679862	0.011100973596854177	0.9465243818921635	0.08938552517045859	0.5884139032288491	0.07361660100492332	0.656042991147713	-0.3334953752301603	0.038011655874415594	-0.3993751904543969	0.011777538712006054	0.028669470283011422	0.8624540777258917
10526	2	0.527751971829355	0.43880943779160864	-0.19986338985785038	0.09001636699180937	-0.1702490120073371	0.14985655628385938	0.0393599140951647	0.7409352469243007	-0.08711497828832813	0.4636444438695613	-0.18159171442135447	0.1241573239523991	-0.13077018259588016	0.2701313754587452	-0.25740666328083	0.027912446912266516	-0.16726087902849324	0.15724518011204003
10526	3	0.491867311755888	0.4198314202409664	-0.05050212891620269	0.6871694650211084	-0.12772865292830815	0.30676211181789526	-0.1057748137408192	0.3979574271332102	-0.07089956245359168	0.5715989696438709	0.05990482776362272	0.6327925661345729	-0.10644351839282014	0.3949643040897053	0.18846879479634676	0.1296483279242298	0.4094297848075691	0.0006410459067100313
10526	4	0.4125027630336224	0.3479621673823075	-0.14660953240172198	0.2158225418333995	0.011734618724261067	0.9215086610710215	0.003973389032297981	0.973385254109847	-0.09255767263514235	0.4360752608013397	-0.21550653516309248	0.06708726458474024	-0.48707152695416756	1.2432823905050811e-05	-0.5223815088156986	2.133599905523592e-06	0.014964040832051329	0.9000065193473273
10526	5	0.47509155544276555	0.3814416215900899	-0.2237301805698705	0.05366225607756728	-0.18377040761207536	0.11451018922766999	-0.033492859308478014	0.7754411787697054	-0.038716343511267196	0.7415620555763576	0.008734993713213688	0.940709537281068	-0.31684464699485376	0.005612305557412409	-0.35061001125290736	0.002043061237955618	0.11190241801280863	0.3391567105607287
10526	6	0.3036012787229108	0.24597345636726553	-0.15031917237124892	0.3887338693224444	-0.11054319374809245	0.5272734562166325	0.06080654236006852	0.7285965459208668	0.03420837102716516	0.8453252373149251	-0.04227670306536319	0.8094492296883962	0.30582601121482883	0.07399143792287448	0.1593253735273466	0.3606074029717521	-0.22782582352145767	0.18808196721841067
10526	7	0.6011682673952052	0.44279921855351834	0.008250701453546056	0.9571018628870442	0.06519201983595162	0.6704954115317505	0.05553647983521767	0.7170932835202022	0.012171987534890856	0.9367483989540961	-0.047273818808692136	0.7578000521996306	0.04168095157487492	0.7857340333425228	-0.019511636188533577	0.898768778398173	-0.06397077228598383	0.6763264012098379
10526	8	0.5828321472629112	0.476600477995059	-0.2588475375947881	0.06127027898008205	-0.2013840941436557	0.14817706011702186	0.08293715253312738	0.554914019219376	0.23518831949406943	0.09003000365799514	0.22012038541033938	0.11324316560180255	0.22849369553175192	0.09983695939313471	0.48308371720997767	0.00024842352313315697	0.3969840900420044	0.003248792801417476
10526	9	0.5956849551225171	0.48223075067932475	0.019618263219825977	0.8880244570517037	-0.07934731084194631	0.5684482592949625	-0.0553944345173603	0.6907443059705445	0.02753278686477094	0.8433368355136561	0.07959623736550576	0.5672316950222777	0.01485712193430742	0.9150838555937314	0.24335849546490873	0.07619015815889407	0.2139989047240437	0.12022507134115501
10526	10	0.5180352905729363	0.4331745717633914	0.07346894132435802	0.6235827745573558	0.15470847554806244	0.299113876271222	-0.16215466300645187	0.276167911463778	-0.019714151582819462	0.895358628476965	0.16396276102877216	0.2707761131663589	0.05434687684199028	0.7167401254547667	0.12865468902820346	0.3887693384468509	0.06033721042532999	0.6870366139736162
10526	11	0.38947600350430106	0.3424056920644805	0.02340845620095621	0.8772820012335776	-0.07396665709510654	0.6251742951329704	0.20176428647379938	0.17873887958411175	0.13101385709236382	0.3854630768764188	-0.0800541729459746	0.5969015265506213	0.1285689756532307	0.394468615352598	0.09229092458360412	0.5418450633127039	-0.04082105051463932	0.7876567509211213
10526	12	0.6539196470355184	0.510086504225953	-0.04572193739000089	0.7264173511723078	-0.10984018978537637	0.3994043012755982	-0.0032631711700058805	0.9800876806474942	0.22982545966312795	0.07478276650526279	0.2863165363559701	0.02528634864279938	-0.20220411158413965	0.11810334454942172	0.02856948036550116	0.8269903455006976	0.3035920624933322	0.017382688687100432
10526	13	0.3994209382369704	0.31343662147171514	-0.007307770782466538	0.9594093754274537	-0.09229714138789526	0.5194652320908121	-0.05665612035311022	0.6929222716087038	-0.036278228870353355	0.8004701611468648	0.03533102796047265	0.8055772305754104	-0.04079172689535836	0.7762513375146446	0.03118834445763896	0.8280054208210242	0.1277884794687561	0.3715148038162171
10526	14	0.4711487108146742	0.381918870814006	-0.06182322300118217	0.6331151902246324	-0.0234486398272516	0.8564444233057885	-0.21124782750895776	0.09931694695227437	-0.232966176790055	0.06842345449576082	-0.004765419609874715	0.9706767550651195	-0.13017154157668484	0.31325710178588323	-0.16614742016154632	0.19683770149081245	-0.05403147412023614	0.6766118849790148
10526	15	0.5365777115017026	0.39342931930861597	-0.006164989239770463	0.9599031225131385	0.05287926472294659	0.6660861465741206	0.018328510145105815	0.881175552602299	0.09256420896849415	0.4493641887240689	0.12229189063975762	0.3168083630487725	-0.3189457781036791	0.007560037549127779	-0.1601472996375848	0.18868374725494003	0.24927751094152067	0.03887042803906081
10526	16	0.4585972802001913	0.3671240225779147	-0.17731219773434595	0.16445814579600262	-0.1306354118280864	0.30748941544617264	0.05305477470556706	0.6796303581340102	0.020230469495488256	0.8749493649297754	-0.07308244764664801	0.5692068256702033	-0.45675443601637034	0.00016801607694737214	-0.5058603226332442	2.3449163933603294e-05	-0.0694238785763931	0.5887464159117475
10526	17	0.6228550770432304	0.4920362071739114	-0.203251402635446	0.10721738220489532	-0.17428330263514025	0.16840294477288223	-0.06278675978162211	0.6220966493231394	-0.1558744291461116	0.21871490808418162	-0.20315347069961254	0.10739032805782073	-0.25454410766891605	0.04237838649155417	-0.3245433706501839	0.00888596877261957	-0.1072727839689945	0.3988334015465992
10526	18	0.5243929459887207	0.40836510810342624	0.08094925288759407	0.5386535595659562	0.04173478862174468	0.7515366450089447	-0.05472078050749208	0.6779513690461518	-0.0447557392524227	0.7341924286399509	0.01308463521241178	0.9209593972453127	-0.25801064085851516	0.046553555365021294	-0.13722530815336365	0.2957740915274692	0.18701287375547182	0.15249315119185555
10526	19	0.5622182498878345	0.415295732502569	-0.16392925659267615	0.1750900712617397	-0.11690672998170473	0.3351409828276217	-0.014477183159022241	0.9053149140880448	-0.04041589377889705	0.7397451216072276	-0.035145593007104896	0.7727009048435727	-0.37731004635467297	0.0012825137767265842	-0.26452813227613947	0.026902296269026883	0.34029864397688786	0.003946082598082889
10526	20	0.48843018813024097	0.37629672082425347	-0.05905081711231525	0.6625988111594123	0.02127673780701827	0.8751701769121221	-0.11948239754047867	0.3760140409465165	-0.09613995085254672	0.4768299203134666	0.05724328183461491	0.6723319635042158	0.015447253740405942	0.909200379279671	-0.007737322444656653	0.9544478870208977	-0.043810957809222825	0.7462462451062418
10526	21	0.5664234411467969	0.4487676271193485	-0.22023203376282421	0.06900911157073479	-0.19839067618312545	0.10222982454961944	-0.24142569094287064	0.045666410147376275	-0.24323698425019133	0.04401766818915827	0.08152502355483203	0.5054520782698866	-0.14927288437548752	0.22088675975590294	-0.11689482539076579	0.33879604634902	0.12855484611448814	0.2924675496027873
10526	22	0.6470586772946678	0.5078183274532304	0.04796610139334347	0.7043685210965042	-0.015640443087647338	0.9015859799582863	0.09403164534476653	0.4562410622071349	0.08530576553537042	0.49926573218658815	-0.016181891840487808	0.8981968344912422	0.019419327058074972	0.8779722811593152	0.07737954964898977	0.5400953738602929	0.16052950824892925	0.2014536688479112
10526	23	0.2760785541445459	0.235823072063737	-0.0222908637301383	0.9176571512980924	-0.14650557186153698	0.4945353346966994	0.045714656435419415	0.8320211555169704	0.0424065328613184	0.8440259994309914	-0.01343423131702616	0.9503213788028816	0.15530299116006166	0.4686820843903584	0.2759185758416133	0.19187008219796037	0.1356237830484401	0.5274657892861766
10526	24	0.5931540977673924	0.45713105634310086	-0.0952060562795837	0.4616872111929612	-0.08020822038161364	0.535450723871399	-0.18533712422932044	0.1492530931778536	-0.27715001826994873	0.029199305651107864	-0.057025518787977535	0.6597633358617788	-0.14819840400757148	0.2503381226760285	-0.06829573626053714	0.5978924603827277	0.11761873828719892	0.3625858591719226
10526	25	0.48715741253230577	0.3924600784586294	-0.060460480265760196	0.7341076710811297	-0.19116222649243803	0.2788125174695972	0.002256059818770778	0.9898967235854443	-0.04302576915195724	0.809083220773264	-0.08139894629926353	0.6472105637842968	-0.3848958058695194	0.024592206829595915	-0.23159857140391116	0.18752694231391018	0.31380074024958604	0.07071945744155009
10526	26	0.5500431527343581	0.4420404194653292	-0.04390657217396618	0.7304733983713129	-0.10478980626363747	0.4099008433331749	-0.16263622400198408	0.19913685707299822	-0.030135371843107495	0.8131338737136128	0.1861464147017481	0.14082470900967808	-0.08779868230018778	0.4902696869665796	0.15815139181474577	0.2119771215565425	0.3665667784795994	0.0028901431444519326
10526	27	0.4857327568620493	0.41030104576951565	-0.16666335760115616	0.17108916503756216	-0.15199979395224503	0.21247156519361868	-0.10508707115986267	0.3901450001974027	-0.15663953991933993	0.19867834267263645	-0.044307016771938684	0.717728970130965	-0.01715990986542553	0.8887017683067848	0.03425697794913658	0.7799046729852349	0.07520692272616532	0.5391006550415478
10526	28	0.3842431420082126	0.33179880468336825	-0.13423882979496368	0.408902508447737	-0.09251567091471959	0.5701800632282303	-0.10737938448155847	0.509573010077736	-0.020082959290573684	0.9021067797487237	0.12736115154436956	0.43353471855320785	-0.11363094450828096	0.48508797693635375	0.008960770364532366	0.9562365913690882	0.17355293499511112	0.28417286672255904
10526	29	0.5593903830426693	0.4396351276066057	-0.0626839009153086	0.6312835299130283	0.06350888327335745	0.6267899199739633	0.035340716371342465	0.7868571412594799	0.09794813025226348	0.4526636950476356	0.08539129883221513	0.5129012784773531	-0.3858666522172722	0.002131559165262302	-0.3657701647108996	0.003745506230638965	0.1494808918431022	0.2502244499824306
10526	30	0.5637370351577552	0.4504677065575814	-0.005104042238822214	0.970498258170397	-0.15429537025750964	0.26069347950934546	-0.10696600083096784	0.4369851686593256	-0.1884429831910274	0.16826177135250822	-0.07724468608634147	0.5751094221293311	-0.15201926406618024	0.2678772269550049	-0.05968535597980058	0.6651180759850023	0.1658923592139379	0.2261098472885644
10526	31	0.355582183046021	0.3035615654242709	0.0005898241765630863	0.9968605378102134	0.042939493846633696	0.7744311670132311	0.01178723132646304	0.9373222653638543	-0.1247690608504506	0.40337278018346134	-0.1657283870378607	0.2655786863962538	-0.20038577727244267	0.176846873464334	-0.2656455691664874	0.07111953835577012	-0.0032315177237216136	0.982800817275932
10526	32	0.33809500731386505	0.2668378635860509	0.17603148397052054	0.2772448076988257	0.09084359574820915	0.5771985932656408	-0.056032155747507945	0.7312892021787625	-0.2726336554607778	0.08875144633300232	-0.22512785238967295	0.16250745846802458	-0.614012658602344	2.5100491862623077e-05	-0.6497229099726544	5.718475444912516e-06	0.20540886114257007	0.20353855008141888
10526	33	0.3982140081595385	0.3140770375562583	-0.04528011629776811	0.7872067412466665	0.1326673786812951	0.4271858502981675	-0.24863560941623525	0.13226139459846292	-0.22006549673284542	0.18430983362491235	0.06646858554858415	0.6917425046102668	-0.4798871160914578	0.0022969617326758667	-0.37597375755831497	0.02000170554332564	0.2267731685727902	0.17095556976669363
10526	34	0.32796964836971676	0.26584155092437634	0.015590337782300609	0.9162392055834679	0.13518232226372456	0.3596156984640888	-0.3867345580356148	0.006621790169868686	-0.40753243698832875	0.0040402661142464385	0.13250346265006457	0.36930288543426426	-0.4756928814028069	0.0006329549246289484	-0.3935221181712775	0.005654828723752317	0.343848686285427	0.016714589170522483
10526	35	0.30906768465862106	0.253104593397247	-0.04328312920753772	0.7777029080467638	-0.0550920447559369	0.7192643626767896	-0.15612741136932365	0.3057597823048447	-0.15247551694384354	0.31735105665371227	0.021330044631157008	0.8893904564530579	-0.24588082989722976	0.10350205881953979	-0.20004841407316218	0.187648768145664	0.1158687166913883	0.4484768561626241
10526	36	0.310336495132392	0.26288386258023133	0.3661106002237546	0.028090792661000213	0.19086241481967509	0.2648298592855993	-0.2920702701502152	0.08390032576271375	-0.022149942513120267	0.8979709433149695	0.4140593594667802	0.012056143400436464	-0.04592579276265562	0.7902621448945231	-0.1471615234146422	0.3917297585606158	-0.10750532693276901	0.5325747201502644
10526	37	0.4151166186877564	0.29244748854304925	0.021531270457770292	0.899344924307117	0.1000766515334138	0.5556388666102703	-0.4706954906428378	0.003280954963571842	-0.4845657992960805	0.0023717934262988813	-0.05102790760280307	0.7642284996025138	-0.3621353506298792	0.027627072105858214	-0.3686974795717328	0.024736595384770903	-0.0312667229455521	0.8542448295106847
10526	38	0.2981008746516858	0.24273549171692624	0.12651940157234673	0.40211187788561803	0.019050674891734506	0.8999983715502348	0.049701945919728624	0.7428959497366401	-0.016329600794008147	0.9142242571984451	-0.18302654416296438	0.22341398359046769	-0.1376257259751826	0.36172381248785024	-0.12272527982001673	0.41648501810913274	0.05627862620557662	0.7102723951889296
11769	1	0.4361794669879643	0.33099456563394336	-0.20480419334484973	0.10172573283384628	-0.2542675680439913	0.04096145887493446	-0.22163035141038273	0.07601215659235572	-0.22924370748091044	0.06622369535922368	0.01712875545809501	0.8922744236543415	-0.25053769303761386	0.04412147044436265	-0.24497478083182175	0.049205262250754535	0.042310988660020005	0.7378867536344408
11769	2	0.41923194660126045	0.313779994429876	-0.06443678178346297	0.6100820535139895	-0.04975546155818317	0.6938750107927818	-0.013375329768783098	0.9157825381139267	-0.060011484630660486	0.6348806345013788	-0.1145299363726304	0.36364176204244086	-0.10355336308132217	0.4117118750300623	-0.1893550235801894	0.13086203975931537	-0.20778919753634595	0.09672798210593403
11769	3	0.3705573061356127	0.2845330200249494	0.09484215257092773	0.5079635947383883	0.07287143604618725	0.6113263029846865	-0.01414832488950383	0.9215041156124337	-0.05444760987739227	0.7043345953174585	-0.059295567997450324	0.679371358175744	-0.3846305881140074	0.005323031926155759	-0.30914693739977084	0.027286042930195917	0.24774427892354556	0.0796318970172186
11769	4	0.32558759810070526	0.27776931902435104	0.0946831272938067	0.49169993968088277	0.01882391217159165	0.8914992257836982	-0.006251627535410316	0.9638691318161299	-0.12205674533513225	0.374685326080861	-0.2108228681684549	0.12234274747338973	-0.15757242830103962	0.2505798477683979	-0.23067699523542448	0.09019151534971921	-0.1043265836112059	0.44844651412770603
11769	5	0.2909806400251469	0.2721411439033572	-0.14007794395242454	0.34767530465527957	-0.10048275987653187	0.5015650415534263	0.1041331060698679	0.4860692496775825	0.002045520259749984	0.9891125911469462	-0.18262669659927527	0.2191932566786487	-0.18219947662977046	0.2202917648584621	-0.28242159836886677	0.05442909042209471	-0.17256676611898655	0.24607803820300714
11769	6	0.3048069961733571	0.2528053081721803	0.25978020519073675	0.16563975782863216	0.29031892199486936	0.1196342513534024	-0.00473971712388584	0.9801686436957396	0.09449036980629705	0.6194235590923888	0.20145878601224182	0.28572717338224973	-0.24276894510678781	0.19613597985761014	-0.2463954705632081	0.18933021658960453	0.09842250911080562	0.604852480963
11769	7	0.3319070703605255	0.2726110011077669	0.14657423463575792	0.2810529544224486	0.13492307713781496	0.3214697325586635	-0.18041185454123435	0.1833284249619635	-0.2010815507211488	0.1372677020807367	-0.03826853596722868	0.779462893968859	-0.1362481634267354	0.3166959895222859	-0.1420788931394654	0.2962304152934585	-0.010018163588287884	0.9415833139951771
11769	8	0.3799647324613218	0.30225598088835254	-0.18132349462847855	0.18521865683437846	-0.2651257945403561	0.05043839354118462	-0.16631992210970692	0.22489875979860516	-0.1478404279277785	0.28140738620958844	0.06056121084691177	0.6605011134021463	-0.2033470450075358	0.13647943337511384	-0.1310763871839608	0.3401420513487883	0.17131790234565616	0.2110749422907804
11769	9	0.41384445205932574	0.3756479974247198	0.05010390149547542	0.6918381951381367	0.09046744373445229	0.47356461268929406	-0.08600997933811232	0.49571724227419006	-0.10977727182721493	0.3840191024612863	-0.036141556453375946	0.7750143357898802	-0.3135463163977232	0.010980170154497083	-0.333224047124488	0.006679731483143297	0.024184109410987413	0.8483507020037433
11769	10	0.41510836807613793	0.35292901142788846	-0.23471441172476273	0.054025937451861	-0.11677808840497178	0.342939413811772	0.00987699918246469	0.9362852023130405	-0.032312232638407885	0.7936438900286481	-0.09208803560446428	0.4551312990984836	-0.23138188317040825	0.05763019725424677	-0.2638722263809723	0.029682635233280484	-0.03670238891000656	0.7663561202889102
11769	11	0.45708171382771023	0.3750505310847137	-0.05107280975579974	0.7111529379711818	0.011808419626585125	0.9318121777074062	0.0030412223827863127	0.9824189991392442	0.07584348777228506	0.5820829336312292	0.09168464841404095	0.5055784627989547	-0.08134109154967156	0.5549456176769285	0.055085426763546406	0.6895655969705551	0.1554587705209675	0.2570720678752472
11769	12	0.4149599655601348	0.3347354575413452	-0.1548872029522134	0.3040416401324541	0.04906581709123642	0.7460762977999384	0.13627440444552863	0.3665021960493195	0.09777555851752276	0.5179894522858645	-0.08401161592710099	0.5788287783502337	0.002033387137598257	0.9892994393649064	-0.0052452442289206945	0.9724017775956423	-0.008232715269484582	0.9566951925322206
11769	13	0.417687901523528	0.3271991557273558	-0.26149192059315257	0.06113284608353865	-0.12219407395033047	0.38815155567501924	-0.08979598525818742	0.5266891127388145	-0.2636493449100786	0.05895199279835993	-0.2033625552140278	0.1481831347441667	-0.2001949601432313	0.15474065061995815	-0.25625330614780345	0.06669855608043665	-0.03027451104187541	0.831284522839656
11769	14	0.41624479285649607	0.33096478877833	-0.043052666383372185	0.7334613897244565	-0.0559012762662433	0.6582780824681642	-0.18965108404360217	0.13024992288764162	-0.22280433136597225	0.07443179934552464	0.018900733808698677	0.8812071002993199	0.045760469004572826	0.7173789939363903	0.11580101361949627	0.35830594986581504	0.11543510313442269	0.359837042932779
11769	15	0.4017431559134157	0.31349827358718896	0.0026616018611355942	0.9837579894170012	0.039567023653909836	0.7620775083026995	0.030110603506477696	0.817813331144788	-0.04483123580109228	0.7315442896542717	-0.12362139083350293	0.34252551134777826	-0.04463850679679723	0.7326551984467659	-0.15107867722871815	0.24513923778063232	-0.14707222148712193	0.2580252667048363
11769	16	0.33371603516734794	0.2729322264613997	-0.17939821449530027	0.18178404183725771	-0.07850054706860458	0.5616228435940398	0.07262106697867247	0.591378238886724	0.054840943708275094	0.6853508586648079	-0.04649908602375452	0.7312459060089043	-0.11877837920952229	0.37885344810955274	-0.04317214550119358	0.7498249894946715	0.17776062144244112	0.1858705533032393
11769	17	0.42109569856149753	0.3382745839213108	0.09227079634268083	0.45769842968747765	0.02624834384367738	0.8330082594229407	-0.10595451980578571	0.3934599179832341	-0.13657427341408038	0.27044245862202504	-0.04624233198992354	0.7102014702854067	-0.3432972562722846	0.004453528957140104	-0.3039751706111826	0.012391198123470159	0.14042769054823098	0.2570270476841373
11769	18	0.46498896818576096	0.3625274914882369	-0.1498577068053468	0.2156307386419109	-0.15809203164884938	0.19117396665929676	-0.14918006565996506	0.21773725013510337	-0.2059911555865917	0.08711541289201837	-0.06011954911201235	0.6210328794767129	-0.2749709151230172	0.02123669920745418	-0.3595817775760062	0.0022336508651899845	-0.07581576860510496	0.532760475838764
11769	19	0.34952809939859547	0.2893168011034256	0.06817673233450515	0.5864956219895869	-0.03494563101242863	0.7805822388169378	-0.09135483865971929	0.465685251165768	-0.08976865737433552	0.473498161688644	0.021856360212961265	0.8617160945266596	-0.0962120819363472	0.44220112267412354	-0.10136852247919609	0.4180113237622297	0.010410552625796113	0.9338817630748166
11769	20	0.3503518806252781	0.3044209548937907	0.04379199193206075	0.7311501340695338	0.014532486124561823	0.9092580248850255	0.09361074069224384	0.4618866100072314	0.0212101364665966	0.867877206423965	-0.20790248540086598	0.0992488137336053	-0.18408105501017907	0.14536513335150691	-0.22786839979463847	0.07015265341937578	-0.048196382287407996	0.705288209201014
11769	21	0.3650114468126416	0.28488862500471895	-0.05842451980052645	0.6546928313746712	-0.07768473011294215	0.5517863402107354	-0.09932492028576856	0.44630480352138296	-0.06248350601859129	0.6323770797521184	0.11995287389700782	0.35714917401112556	-0.25427079004334596	0.047988923111980115	-0.2612071057211568	0.0420185108926728	0.03559822876006685	0.7853409904876851
11769	22	0.41163468099472855	0.3546954275576337	-0.18126427429089187	0.13316696087381863	-0.25722030826323505	0.031585155738720096	-0.38148993068799664	0.0011201212762838645	-0.2621540071431986	0.02835474955722182	0.3756743104769416	0.0013516432568337039	-0.17349933127234177	0.15089383765242018	-0.180495389095651	0.13484855028394105	0.042351129922938525	0.727756688840312
11769	23	0.39284880663577165	0.3380615494219222	-0.01805715657662562	0.8803301387438139	-0.04386327262212472	0.7144736726959852	0.05485017426972181	0.647226617962793	0.04478976427425893	0.7087094961123539	-0.043408569319670215	0.717308478392756	-0.09325043158113075	0.43591620290505223	-0.13125444341558595	0.27176734912662176	-0.05992482189307439	0.6170542368027926
11769	24	0.4671491412845668	0.363331385446034	-0.09183093977890558	0.5131234927668956	-0.0369621219351427	0.7927343391154869	0.05534624736106609	0.693861003377952	-0.004431297910238949	0.9748777982903513	-0.14822052411713835	0.2895108179224548	0.13831408152040575	0.32330518613350184	0.06877829626710137	0.6245910425925488	-0.19912001561941717	0.15288704398191802
11769	25	0.36672726687244434	0.3068818477319784	-0.318875592832083	0.006721282838053077	-0.23363055916036712	0.049891555981412795	-0.08334446928704468	0.4895584364683916	-0.10688198329888648	0.3749912226066844	-0.03751452779223084	0.7561035427768985	0.14007818430367627	0.24396870710995816	0.07361023536703398	0.5418154761758974	-0.2107724130794382	0.07767223688131997
11769	26	0.43986776759611357	0.35364527772059035	-0.08662747186203387	0.4599032377212186	-0.08156356105062808	0.48664333195451337	0.011942055029419476	0.9190045073334964	-0.018517446356270926	0.8747044037110341	-0.07777055758814828	0.5071985977990475	0.16121675218504064	0.16703761690564384	0.20591223964346253	0.07633701026175675	0.04831141704323273	0.6806308771671358
11769	27	0.40798394107357355	0.379964037040426	-0.1877833194444003	0.11954104870312407	-0.18478899701200532	0.12566073835657945	0.15983902856858886	0.18625272253597597	0.08323904457731017	0.4932944039542031	-0.23985413990049517	0.04550804144472821	0.12702782364407725	0.29468147367251546	0.14589487430854214	0.2281545676743946	0.012794838613511404	0.9162757685069204
11769	28	0.528289619468395	0.4575876205641631	-0.41604968787077584	0.00025140220582111397	-0.3620162950147841	0.0016486125778540613	-0.1023259735437829	0.38899133767400135	-0.08698061402195464	0.4643368475333534	0.06448866040390447	0.5877867447225792	-0.03422127304570635	0.7737874263800301	-0.06860437662787604	0.5641291151672067	-0.08346486903843067	0.4826528625609161
11769	29	0.4900390466176372	0.3921268475346244	-0.1620858061610104	0.17686648536187066	-0.23333496677521903	0.050190044430397464	-0.20197565954549268	0.09119535300561228	-0.19901264834396865	0.09614563849746446	0.025045388158908534	0.8357577777762706	-0.08701677460012479	0.47055755812322264	-0.056358580315730836	0.640622975056921	0.097449330770789	0.41881745518184227
11769	30	0.44082471596080414	0.362672120193002	-0.1011376590602985	0.4083006433139383	-0.1697621323180637	0.16315651530967054	0.2525246853060132	0.03631669925742079	0.1755411952218261	0.14909220197292095	-0.2664450014761944	0.02689788293803289	0.21228280634225757	0.07991875683694034	0.17224078235985407	0.1570090936508398	-0.15811172563234718	0.19443857053644278
11769	31	0.4107683740670735	0.34189111973756653	-0.24973617074698767	0.02958015637305005	-0.24540692234421352	0.03261892968671314	0.20204016551563792	0.08007467423116607	0.18093045249564102	0.11779100367706276	-0.11238000044637853	0.33377634426401576	0.36969971924008943	0.0010132185335551254	0.3775528303981412	0.000773128938010134	-0.10013385916417916	0.3894335296117985
11769	32	0.40560116347499264	0.3349043822794715	-0.23042584418130843	0.05320648636167293	-0.282983847969299	0.01679157028052097	0.05525593010548567	0.6471820908944775	0.06045529653798812	0.6164964530140729	-0.003536026869336793	0.9766521952056334	0.07505143872083221	0.5339103583626108	0.029505590964926536	0.8070304599554573	-0.10717240213394909	0.3736874573551519
11770	1	0.5190311800117603	0.3863396719499435	-0.17066214963117612	0.14321668156890766	-0.15270124816532804	0.19090540212464774	0.0578374872787933	0.622092158181794	0.009671313784577444	0.9343674595869563	-0.11359515854490156	0.331854461154492	-0.18480494404568498	0.11244881260975373	-0.2291805495327205	0.047947234308214653	-0.053142790948940234	0.6506781592662656
11770	2	0.5194558909326453	0.39700713159987194	-0.127883657365538	0.26451131584263443	-0.12593927519460163	0.271903621241387	0.01745647906619102	0.8794283966330431	-0.012925653777099644	0.9105713613519283	-0.0740332950248426	0.5194633487431506	-0.17919640726354114	0.11646069357693871	-0.24317855404645547	0.03192593721208384	-0.12048676608974115	0.2933670606574809
11770	3	0.5098314912821278	0.395276429601261	-0.055942686422932056	0.6504640405480443	-0.013428979664897974	0.9134483718116377	-0.11880440321609917	0.3345718412877417	-0.14938352228270946	0.2240436772209054	-0.027641594785982153	0.8229477818944492	-0.026489135524510155	0.8302173244757516	-0.10986557337901882	0.37245612665167344	-0.14610174466446257	0.23450219082002224
11770	4	0.45283344876740617	0.36544839098487497	-0.015254781612197793	0.9040010618707526	0.09163453452233977	0.4678535064774088	-0.16525585930566244	0.18832526099293972	-0.14138664347766405	0.2612538706878356	0.07341152964313818	0.5611301476293915	-0.42347134787816715	0.0004400413530785116	-0.472612358527241	7.0327781474035e-05	-0.017038356758261614	0.8928395984905333
11770	5	0.4610673667190936	0.3703884786038098	-0.10490074205318331	0.3771049146463639	-0.12207736290480868	0.30353544667192783	0.04495582164058538	0.7056800563372994	-0.07365771433216159	0.5357109741906646	-0.2401759012162054	0.040686690442154706	0.12442310640930826	0.2942677690358316	-0.06437245583433544	0.5884611706672577	-0.39791074424332984	0.0004899102058112921
11770	6	0.39892941322857983	0.3217935852593685	-0.24013803107326454	0.048554623046129064	-0.279374184098622	0.02104289455555529	0.04192218529067661	0.7342788384023458	-0.07735275006985572	0.5306712609599028	-0.18413264239210056	0.13280530975537605	0.015187069555510538	0.9021696674427879	-0.09484981650301572	0.44166324858095896	-0.16218568428055977	0.1863714545143544
11770	7	0.3746458202083252	0.298157218904155	-0.01823070473982359	0.8989593075608889	-0.027245315461543563	0.849479966377138	-0.12912802941298646	0.3664802295483527	-0.21042790828781	0.13829966667551458	-0.05458547127895664	0.7036202841500575	0.009701669025510569	0.9461297730616347	-0.029695298215385257	0.836123095640378	-0.04929524286788644	0.7312073291735033
11770	8	0.525608530439898	0.41664117625172037	0.052970226052378125	0.680113279205438	0.004727419823416429	0.9706671742495433	0.0018391284218825382	0.988586396674955	0.03377485467898571	0.7927153166882112	0.09771490005575814	0.44612996661990423	0.008031366013857805	0.9501874031766848	0.0010340382971439008	0.9935826279143603	-0.02234421407838935	0.8620054372360948
11770	9	0.43300913601025764	0.3911961918774299	-0.16797053313412905	0.20754120260318204	-0.11273903067877321	0.39945482519703024	-0.2083435405836813	0.11654692782010403	-0.17774771467336964	0.1819169641298774	0.1389907848031261	0.29808879763118273	-0.19291911327793523	0.14680377273139497	-0.13142757258455814	0.3254067352829109	0.2116236489604648	0.1107763417969119
11770	10	0.5384558150902591	0.41287742690958495	-0.006535175312730792	0.9568638589747163	-0.05292094579678083	0.6611600506096966	-0.09120186973895521	0.44939830919378426	-0.14602020876810248	0.2243378872094174	-0.10504566707885112	0.3832984094035936	-0.051387486659790566	0.6704034825587682	-0.054604922683234414	0.6510672718451489	0.009889439541291371	0.9347637923727339
11770	11	0.4869113007349895	0.4067192826340172	-0.0940421853554092	0.47478809742208794	-0.06825422779521319	0.6043338812552113	-0.011248784915724206	0.932020944202339	-0.031760901342691494	0.8096292350423269	-0.04459591822155312	0.7351067962800664	-0.09889823566983298	0.45217530238535264	-0.0507187318219649	0.7003491928526439	0.14576951327235518	0.26642972320948827
11770	12	0.44031000124105846	0.3841773531326101	-0.0822532329715682	0.5581931989931036	-0.005073310053401262	0.9712394944632913	0.1738161902119405	0.21323187292744242	0.058175419090369426	0.679038766131951	-0.18207315148370953	0.1919462828137462	0.0783797484782908	0.576935776983408	0.13309012957898947	0.3420908200316435	0.034475578129313345	0.8063991462806469
11770	13	0.6003316005885696	0.4750477546791348	0.025308738204442446	0.8328661510737304	0.07669270934708	0.5219684349990754	-0.2182134413925492	0.06555470629271158	-0.2765690275202518	0.018684477489067267	-0.06236066535773644	0.6027890742838892	-0.040185197855178656	0.7375116071679412	0.061219524734295414	0.6094539380883709	0.21101549331370104	0.07519341102517464
11770	14	0.5468903623075823	0.45310579046521027	-0.05401985098445771	0.6385472431996474	0.03296739409865573	0.7744666901148672	-0.07769006086590148	0.49898658035184035	-0.09201976731551989	0.42297094811534736	-0.008624852741216403	0.9402591111611417	-0.04916821502269149	0.6690226448117091	-0.018608622407193187	0.8715362152623273	0.08134185999206615	0.47896526245980076
11770	15	0.4689319806476261	0.38086498415581366	-0.18184054507416128	0.11592404646565971	-0.1709992354893357	0.13969371974897818	0.0638636253348357	0.5836349026004453	0.05222403949879605	0.6541249559984322	-0.05285821604255566	0.6501977976824133	-0.24367334422253228	0.03390711245309741	-0.2393203749505151	0.037330610563979114	0.11823496524189438	0.30903966544593753
11770	16	0.5236857801148281	0.4183073998942275	-0.15496372197676203	0.17551138036622685	-0.14700727337441968	0.1990152852849985	-0.052338844464328835	0.6490421060725791	-0.0028969057803070277	0.9799179649722952	0.11413103349200712	0.3197557843012227	-0.13821672583043965	0.22751268114436898	-0.10700497311161226	0.3510960594409283	0.09848366646289547	0.39098664378698605
11770	17	0.5262678904168229	0.4286645745854173	-0.24187875560798794	0.04213201114154613	-0.20381821623849677	0.08821953256941996	0.10229627257592981	0.3959403198937521	0.1299208137037193	0.2801931478054781	0.058119328318098545	0.6302060222094844	-0.09221761537186506	0.44434364589111447	-0.04091850728994582	0.7347547673015645	0.18856924366454272	0.11528549055654126
11770	18	0.44177125890034147	0.35722823366041273	-0.22789559232401602	0.06571588233927164	-0.17666563570348656	0.1558977105451573	-0.02073346356173994	0.8687559786507494	0.008253367997812754	0.9475604145282495	0.06864442490234575	0.5839244063240776	-0.11061568741558415	0.37659169707010215	-0.1645695955656955	0.18668543435932494	-0.11544331008826227	0.35598765476287014
11770	19	0.39152465102666684	0.3170129011340352	-0.09979424399935605	0.42531462491701877	-0.09500500033871126	0.44797459717456717	0.011745606912359818	0.9254255046510721	-0.026116378492361782	0.8351102368409353	-0.06896141242839991	0.5821846352777417	-0.10920597260083455	0.382741116294772	-0.14925303162264913	0.23166413114220583	-0.07415399632437238	0.5540279817162796
11770	20	0.41624454241720527	0.36024433525957905	-0.17784745060601886	0.13501422834912974	-0.1972495072122251	0.09675652812460972	-0.0832786742848735	0.4867512658537917	-0.07625090993047974	0.5243758938746845	0.04239957578890833	0.7236125282316389	-0.3705480787595077	0.0013550553927759263	-0.41573857584711466	0.0002814708211842942	-0.005308476375845687	0.9647004404641967
11770	21	0.30370097919076455	0.2429277767773175	-0.10785796718384719	0.38130858527232636	-0.14487190782756584	0.23850715567327618	-0.14941353055471765	0.22394957398406615	-0.19017673966067394	0.12033319119637592	-0.07793469076009509	0.5275744786177676	-0.014111435943962723	0.9090680514151097	-0.09133841091888473	0.45882550074976947	-0.19042048906218206	0.11984969103124207
11770	22	0.5375765505743182	0.434395251319975	-0.2917824002032165	0.013551237915463449	-0.2464842115186562	0.03825281849723723	-0.09700515212698214	0.4209512965142473	-0.11854058686997732	0.324826325442086	-0.019306862234674028	0.8730309369933826	-0.26884069379792497	0.023390618927612208	-0.2737005323405637	0.02091042644518921	0.08372980878473173	0.48754587077061
11770	23	0.46159700942528825	0.3659961301987698	-0.07296372043060882	0.5543138613439994	-0.0462573028141264	0.7079757242684195	-0.05100229355358726	0.679571968727436	-0.05603040611046558	0.6499517288056067	0.011034336140303035	0.9288377804518785	-0.13361290738089676	0.2773673354895013	-0.12649700801930513	0.30398837727228745	0.07264617051639768	0.5560437530138481
11770	24	0.5057182623071698	0.4142917829110094	-0.2843583243190667	0.013416197770654881	-0.27365877571965846	0.017516114315806002	0.026058810552678013	0.8243737163529807	0.016720980743400872	0.8867753742937861	-0.03540549706333069	0.7629835562433598	-0.11015638250546947	0.3467937750733596	-0.12463578911376225	0.2866907331888503	0.001800154098983842	0.9877705406329336
11770	25	0.44293782948969	0.37544139901089246	-0.16918977934069818	0.1524454249379573	-0.21711878642090127	0.06501965469882195	-0.12608565230460386	0.2878129388290369	-0.16560096193578183	0.16146458390359755	-0.0714939604390938	0.5477923249145363	-0.16578153311512117	0.16100156884096054	-0.14441080109015905	0.22286244627059362	0.11747291704596194	0.3222728914071941
11770	26	0.5864544708106663	0.4930700197771534	-0.19872596733465275	0.08962555598408703	-0.2534869324747899	0.029318302178728346	0.1035808461591067	0.379817809276632	0.07640358141155223	0.5176282287384577	-0.10212933510305017	0.3865670470813526	-0.19922555434671613	0.08880582326083981	-0.23648599991625693	0.0425023306835078	-0.002289513900638843	0.9845540324848246
11770	27	0.5245466397941021	0.4263171939987151	-0.014952397374946134	0.9015039711502048	0.020677127423551527	0.8641024578782219	-0.11329704286320842	0.3468348654819111	-0.1560575165019147	0.19373733874197005	-0.04290172618799199	0.7224072223796744	-0.3151426882970806	0.0074309895511379224	-0.30665778305293345	0.009293276453415714	0.12860155875766013	0.28514739085724244
11770	28	0.5204998658315767	0.4411288433705398	0.027401179706991644	0.8179999420289594	0.040988173012180704	0.7306181163586479	-0.135520965812577	0.25295976310714996	-0.03609875315403113	0.7617349206711139	0.21803436687398556	0.06386857718119913	0.02283417517187683	0.8479357333411919	0.05185867758719081	0.6630350702273722	0.0577981050934937	0.6271726237239204
11770	29	0.6441931181513041	0.4983250506125483	-0.11905035631078754	0.30900451962070286	-0.1402291237228392	0.23015400409393297	0.016521859193275725	0.888114965998299	0.05347421209897433	0.6486429048887421	0.07172230846761371	0.5408757736448274	-0.14439497545678456	0.21646483445057862	-0.14103698090625444	0.2274533286748896	0.07595500274967204	0.5171932201023353
11770	30	0.6244074401979915	0.4735517773093006	-0.353358585147712	0.0018724143225318794	-0.32627593252546344	0.004279371343020614	0.14925660471916163	0.20122743898508158	0.15952549886648487	0.17159397535782922	-0.007956080129467254	0.9459882605848761	0.04778288597660281	0.6839387717733906	0.03994940789191414	0.733632884201542	-0.03379847442845551	0.7734467155420425
11770	31	0.6255535878084455	0.50332037976033	-0.12075921013988986	0.302061455812499	-0.10568427629083094	0.36683866376668806	-0.04746117422508771	0.6859551720147125	-0.03516237259775809	0.7645638463165201	0.04838841813952269	0.6801494536177968	-0.19085653108384412	0.10095941809762767	-0.1738689243125265	0.13573924847537575	0.10974696303655579	0.3485999489484892
