# Supplementary material for: Distributed coding of duration in rodent prefrontal cortex during time reproduction
Source: eLife. 2021 Dec 23;10:e71612. doi: 10.7554/eLife.71612 (PMC8786316; doi:10.7554/eLife.71612)
Supplement: Figure 1—source data 3. [file elife-71612-fig1-data3.csv]

Subject	Session	Slope	CV
10526	-8	0.09313605941858934	0.18983065152914508
10526	-7	0.5421745318809496	0.1759987845936294
10526	-6	0.8093963824328317	0.15273246954869485
10526	-5	0.7442079495778484	0.1271841677463868
10526	-4	0.7837387240949104	0.13378484197748744
10526	-3	0.7009337472906315	0.20778912988375417
10526	-2	0.8113444631727598	0.18385860325439488
10526	-1	0.6475002147975092	0.30639369473935074
10526	0	0.723981409170117	0.1689757483842596
10526	1	0.5857086357958422	0.1628821275721846
10526	2	0.7460894176126346	0.1260011005500128
10526	3	0.6851435119597958	0.16847083804574342
10526	4	0.8364025089650379	0.10869528735737316
10526	5	0.7211805789947603	0.08308500952483258
10526	6	0.6436262520132688	0.16919315940724755
10526	7	0.5611223815171971	0.1802725481399471
10526	8	0.9956494464735601	0.21338003926446986
10526	9	0.4469179526290612	0.23786096744122331
10526	10	0.4825539053026802	0.14580853019952478
10526	11	0.6335227451508824	0.19000346097091458
10526	12	0.6202188836304774	0.1745164886200677
10526	13	0.8165313018314678	0.1444585540869648
10526	14	0.8396483477871864	0.10859969824643725
10526	15	0.8336226805947462	0.1550524870720565
10526	16	0.8389664900276171	0.11398043310954545
10526	17	0.8426445937606492	0.09710749057230593
10526	18	0.7932175185188585	0.1289401343339932
10526	19	0.6945114965976638	0.10535959077893702
10526	20	0.8245834948585621	0.12321532777502352
10526	21	0.789789463805185	0.08727812014171223
10526	22	0.947016294145029	0.09032023740179464
10526	23	0.6914013138833337	0.17375985255323487
10526	24	0.5216618568764836	0.13319258089483557
10526	25	0.8323717980249996	0.12621087308378356
10526	26	0.8068687309364676	0.16360450842414495
10526	27	0.6481424524092906	0.14607063787439534
10526	28	0.6116790620200936	0.17800209253400479
10526	29	0.7361011628565723	0.12424578161845162
10526	30	0.6121313221965987	0.11897523447437833
10526	31	0.6006943516524584	0.13746101537515296
10526	32	0.6045881255616454	0.10979378777111841
10526	33	0.8382471562826267	0.10888769254987582
10526	34	0.7096661319194674	0.09986598553022524
10526	35	0.8570126392189893	0.10882997082414299
10526	36	0.6156220477796818	0.14127256383654857
10526	37	0.8878445201825366	0.10349545136883949
10526	38	0.8882794277831133	0.08829510150339208
11769	-10	0.07491779788346344	0.4095066896457243
11769	-9	0.0920602213096958	0.4220708562235935
11769	-8	-0.17701813447786072	0.31848476687252536
11769	-7	0.20315651597244833	0.4107399132681471
11769	-6	-0.008146606731194682	0.31693227920603295
11769	-5	-0.14802753489788034	0.3189626881052729
11769	-4	-0.34794086065825003	0.3342352225059417
11769	-3	0.050578000716556624	0.2814567250254272
11769	-2	0.11191069574102988	0.2943369940514719
11769	-1	0.6859718678668684	0.15767977699539787
11769	0	0.946614059877486	0.10590267321295069
11769	1	0.7419655577747909	0.1450414021637027
11769	2	0.9014285552030321	0.09512335269946598
11769	3	0.7389739028756245	0.11202481182187907
11769	4	0.808016060386507	0.11290413571850803
11769	5	0.8143701622272425	0.14230176326859714
11769	6	0.7594778401632623	0.07166154681644553
11769	7	0.8399322995840391	0.13574595701016945
11769	8	0.8357880282688933	0.11007027595965527
11769	9	0.8395107874512096	0.0912964163455319
11769	10	0.8443554372248789	0.1015948794982885
11769	11	0.7338616529755747	0.21649617500890958
11769	12	0.45177400194010664	0.18169797675769128
11769	13	0.641011671460143	0.1866132641901882
11769	14	0.772838409401439	0.08731294699148408
11769	15	0.723159934567581	0.12144815057750612
11769	16	0.8545030695117032	0.09437666420145742
11769	17	0.8480437067612797	0.11477884844698875
11769	18	0.7335562995130045	0.11707256428329706
11769	19	0.8106675093828438	0.10947182610290895
11769	20	0.816597928023063	0.09223087427839656
11769	21	0.8618779795384816	0.07954611541450302
11769	22	0.7802996132668516	0.08845424686591873
11769	23	0.8110971119094106	0.07579416325159596
11769	24	0.7910128049867717	0.07332833575979593
11769	25	0.8026050664244752	0.07849415671887787
11769	26	0.805671615869591	0.08124484478233561
11769	27	0.8202665993941801	0.08339442015955384
11769	28	0.8867676822057786	0.08926491439630828
11769	29	0.9229487510570309	0.07721953459603742
11769	30	0.8565140450841437	0.0874223058855614
11769	31	0.8156280628596325	0.09301500352503203
11769	32	0.7783087620471348	0.09737147902794893
11770	-7	0.5674226880107798	0.2801802749855118
11770	-6	0.5941719094005228	0.25861815452984754
11770	-5	0.611875409918562	0.20901051243485752
11770	-4	0.7688851899703989	0.17349503434882468
11770	-3	0.8374700492855617	0.14212033900580584
11770	-2	0.8385278653701292	0.17725488831621922
11770	-1	0.7734758661480866	0.16554279845755548
11770	0	0.9620127320061632	0.1837859672962103
11770	1	0.8048941756608015	0.1018222647709986
11770	2	0.8465250499471939	0.10273655277600521
11770	3	0.7783534479814911	0.10182438752687717
11770	4	0.7896051734720902	0.11696082651330779
11770	5	0.7751783679939791	0.10084700382584527
11770	6	0.7254148473016874	0.12162630106123232
11770	7	0.5802103233781805	0.12461415823005531
11770	8	0.8917988827343766	0.0831788903678289
11770	9	0.8368839223141018	0.07605056206587435
11770	10	0.8237684405455739	0.085119817770218
11770	11	0.8307491665518825	0.07611828986022517
11770	12	0.5463578826896126	0.17691942606139952
11770	13	0.8125928166879431	0.09659863025956117
11770	14	0.7878734877313917	0.09190190857726437
11770	15	0.7564477927046878	0.0849619666248343
11770	16	0.7947885491164627	0.10452001821957395
11770	17	0.8839646973462194	0.07590486613773142
11770	18	0.872849745151087	0.10583250170020465
11770	19	0.8333821854289428	0.13112230077325754
11770	20	0.8409044954921735	0.09263182098382212
11770	21	0.8477875728657485	0.07384151707880185
11770	22	0.8174533253866584	0.07436142607240577
11770	23	0.772528660516786	0.08533116974984498
11770	24	0.8411723837412156	0.06680310151076807
11770	25	0.8579271148082973	0.06643739149447898
11770	26	0.7736238149345144	0.08404787358581328
11770	27	0.7651549033460785	0.09025303158929243
11770	28	0.8461508945960071	0.10721099336662523
11770	29	0.7605988484058992	0.08659247376482933
11770	30	0.8591970223966868	0.07834435100053232
11770	31	0.8475646534654885	0.07684843521201033
