# Supplementary material for: Distributed coding of duration in rodent prefrontal cortex during time reproduction
Source: eLife journal article supplement (doi:10.7554/elife.71612), 2021-12-22

**A**

Virtual speed (m/s)

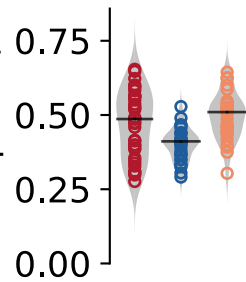**A<sub>1</sub>**Virtual speed vs.  
Stimulus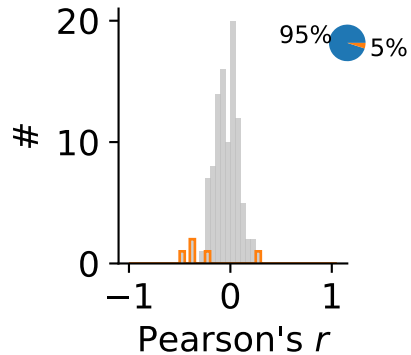**A<sub>2</sub>**Virtual speed vs.  
Reproduction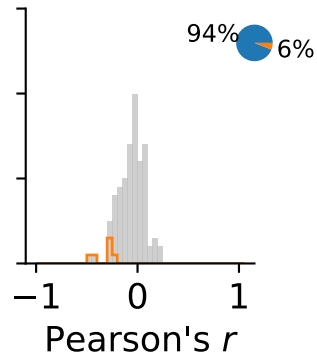**A<sub>3</sub>**Virtual speed vs.  
Bias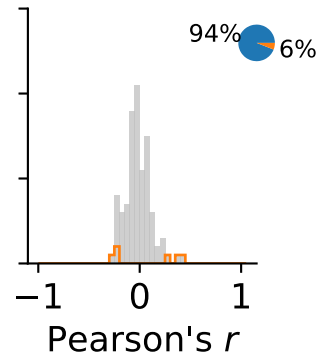**B**

Running speed (m/s)

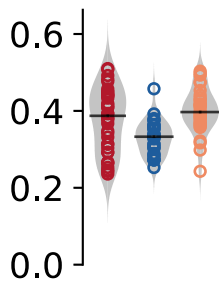**B<sub>1</sub>**Running speed vs.  
Stimulus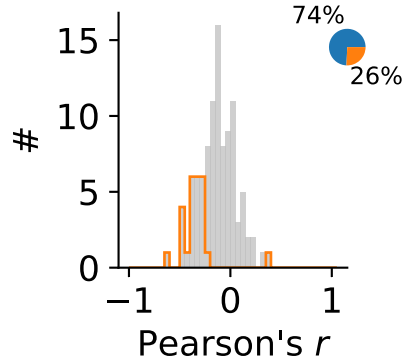**B<sub>2</sub>**Running speed vs.  
Reproduction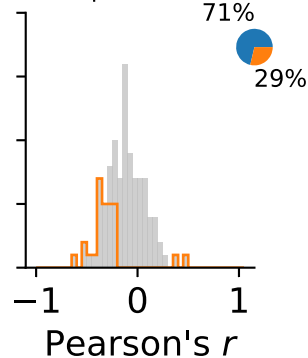**B<sub>3</sub>**Running speed vs.  
Bias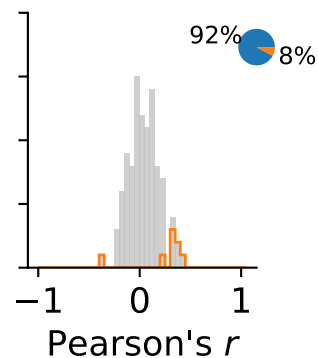

Supplement: supp [file elife-71612-supp-v1.zip]
