# Supplementary figures and images for: Distributed coding of duration in rodent prefrontal cortex during time reproduction
Source: eLife journal article supplement (doi:10.7554/elife.71612), 2021-12-22

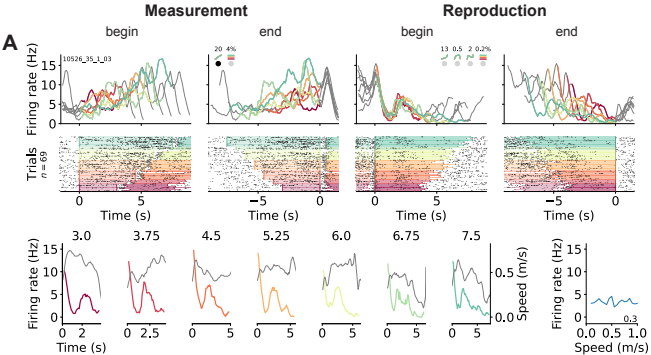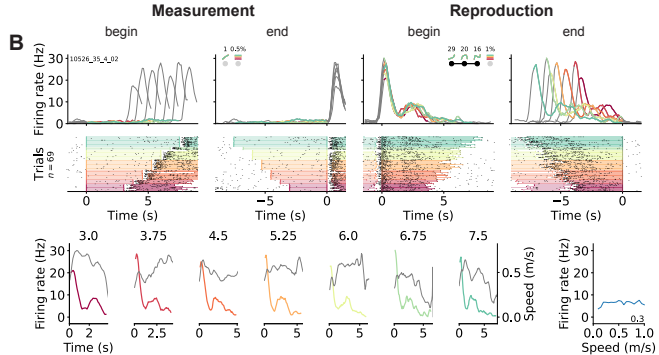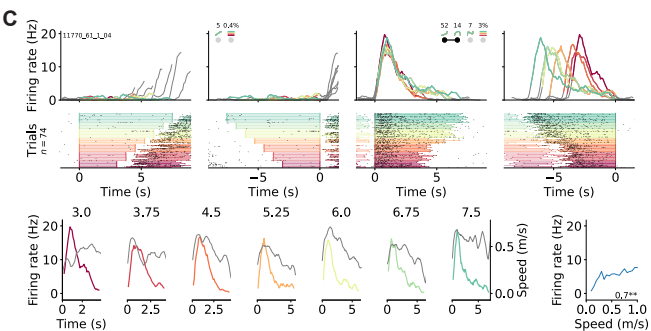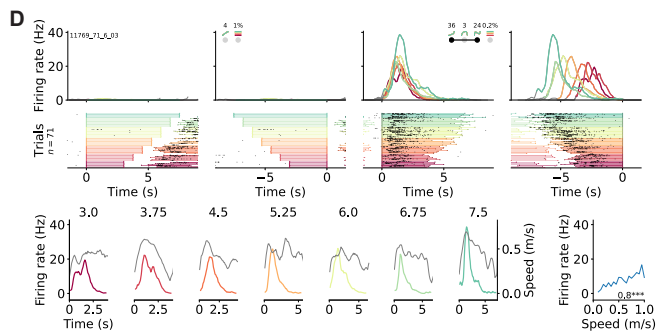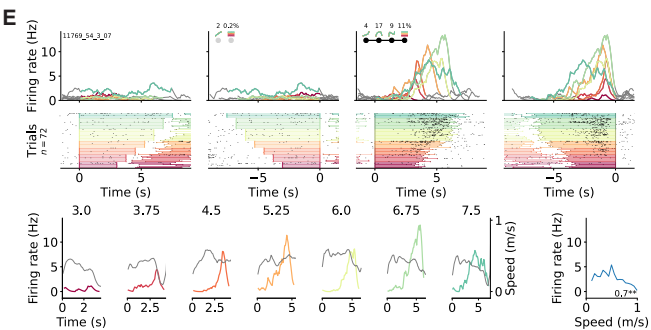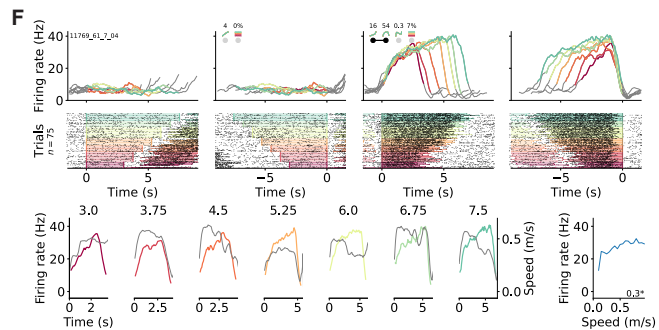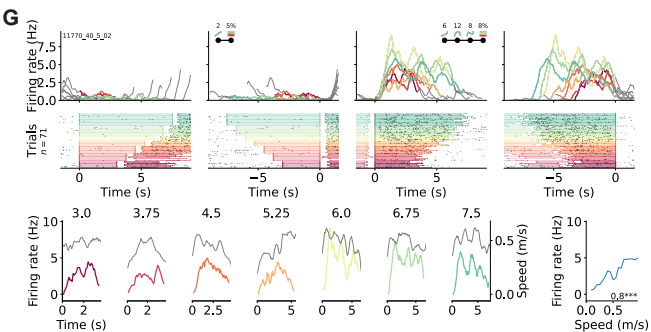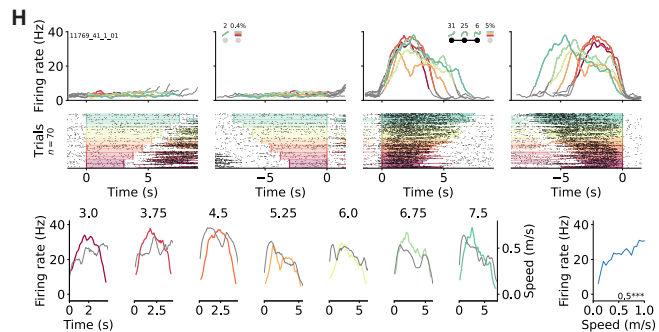

Supplement: supp [file elife-71612-supp-v1.zip]

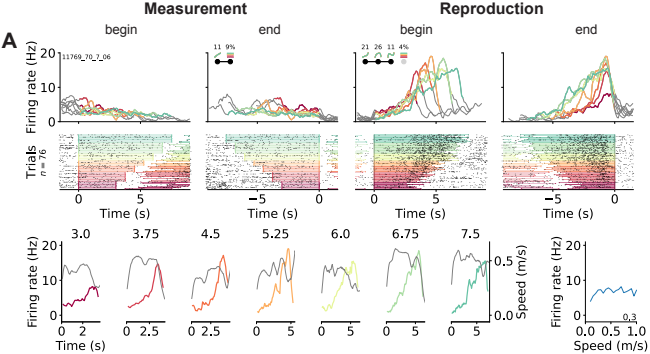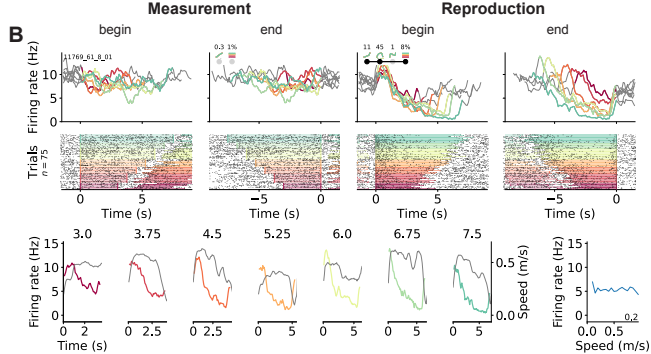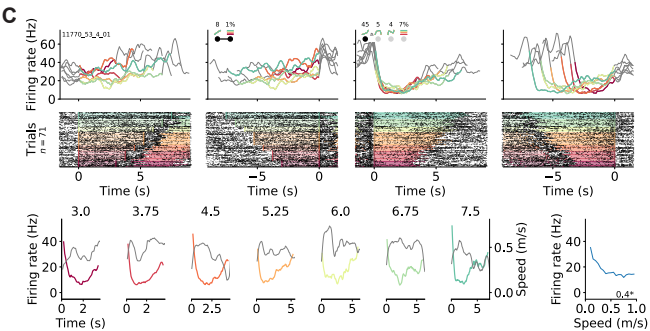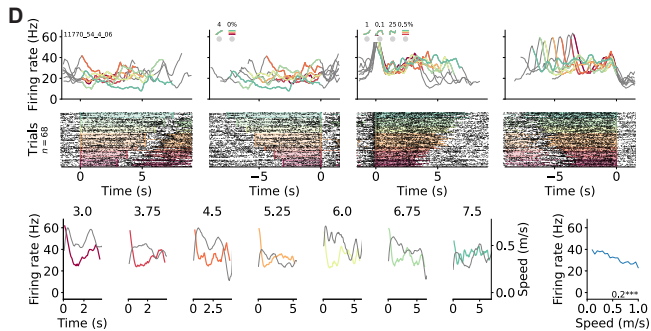

Supplement: supp [file elife-71612-supp-v1.zip]

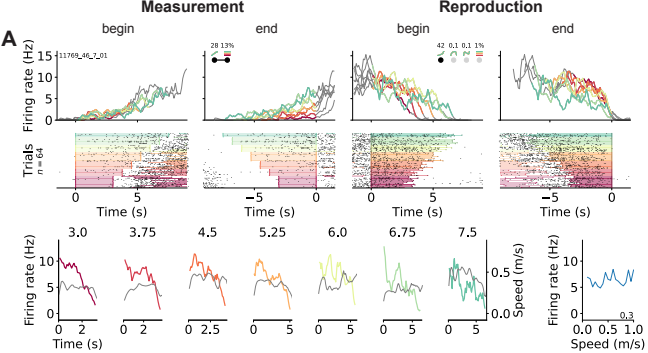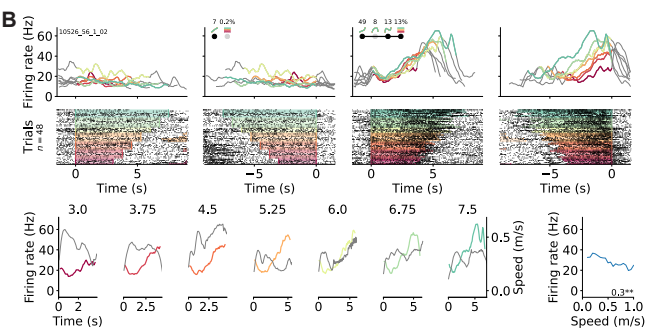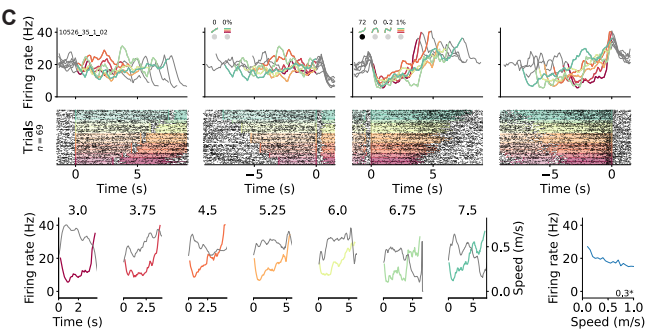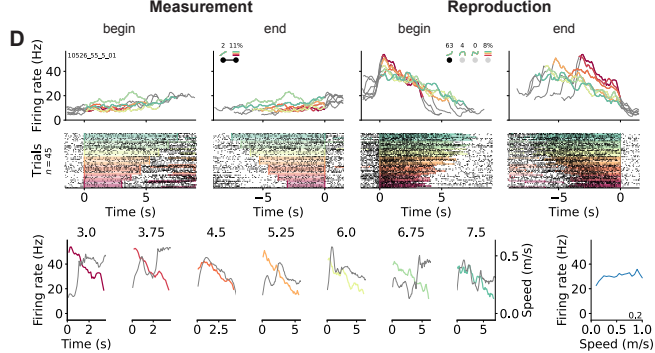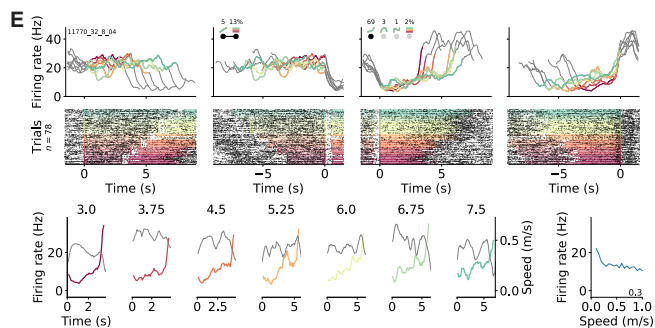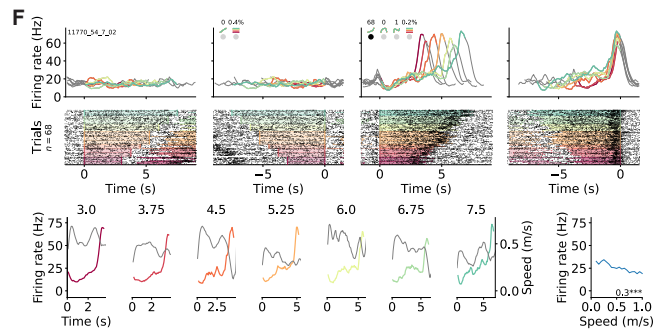

Supplement: supp [file elife-71612-supp-v1.zip]

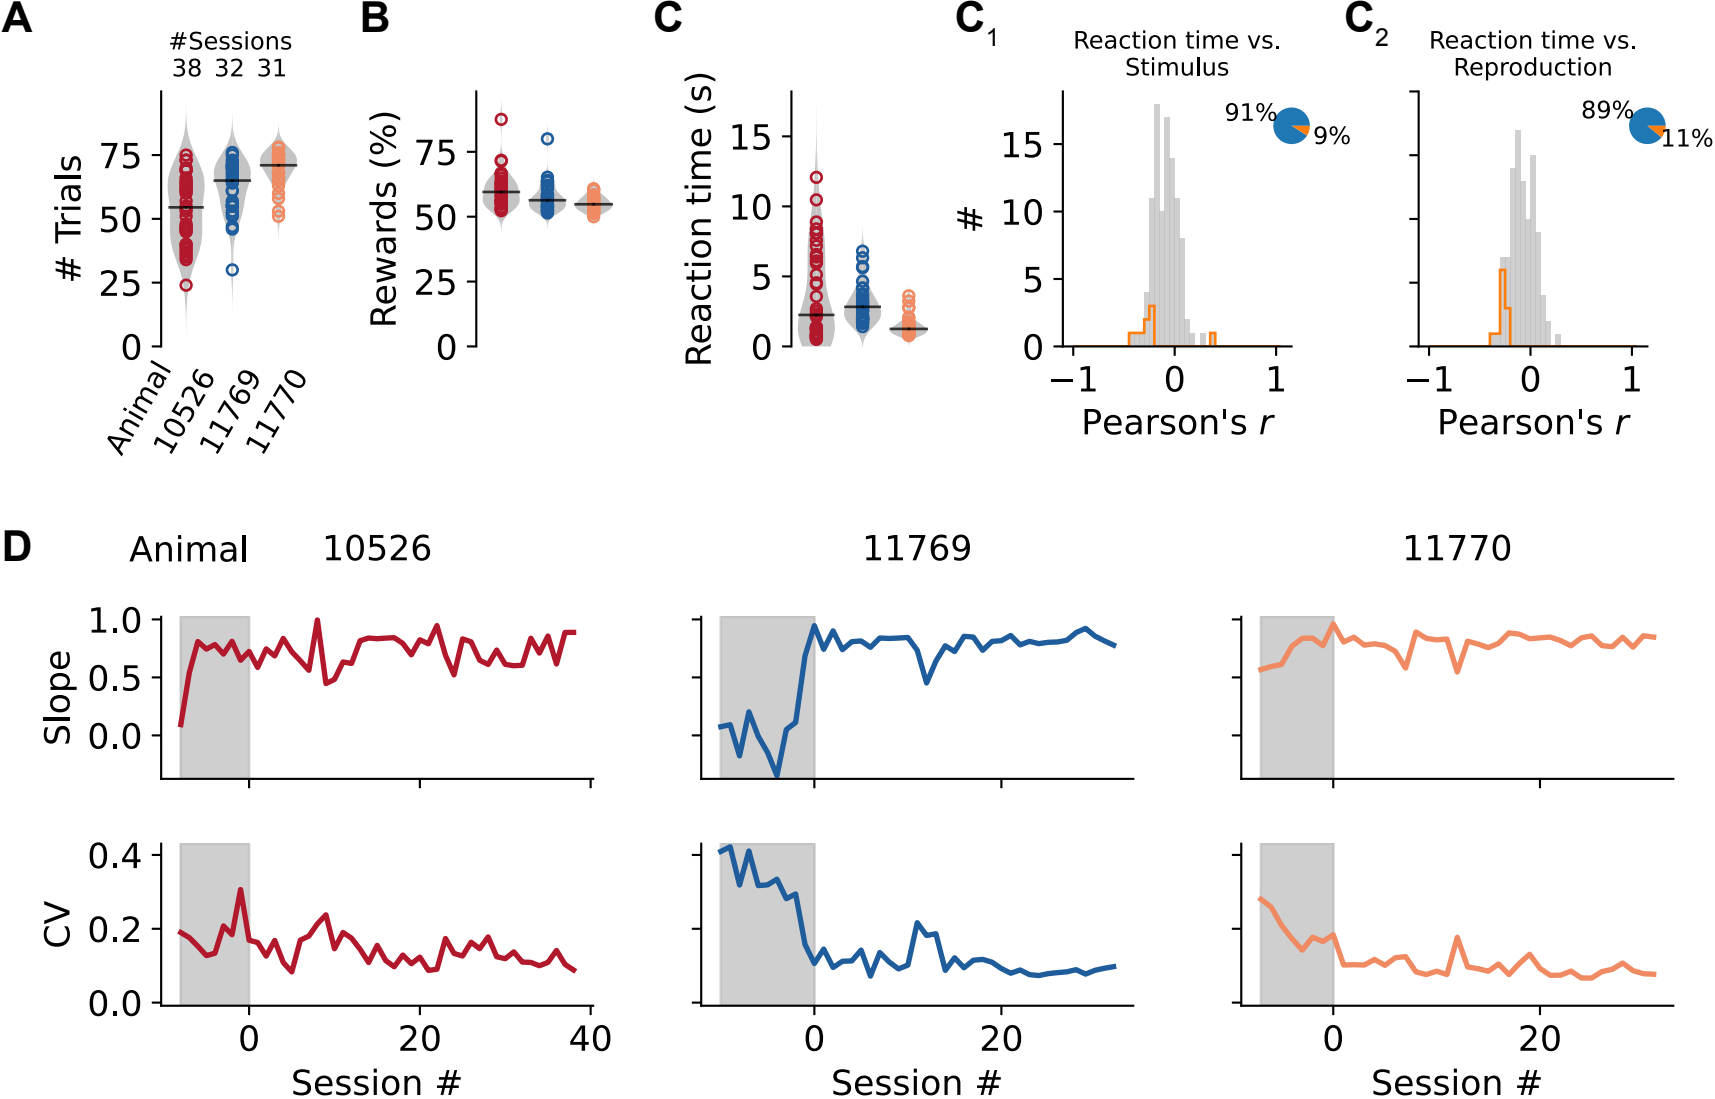

Supplement: supp [file elife-71612-supp-v1.zip]

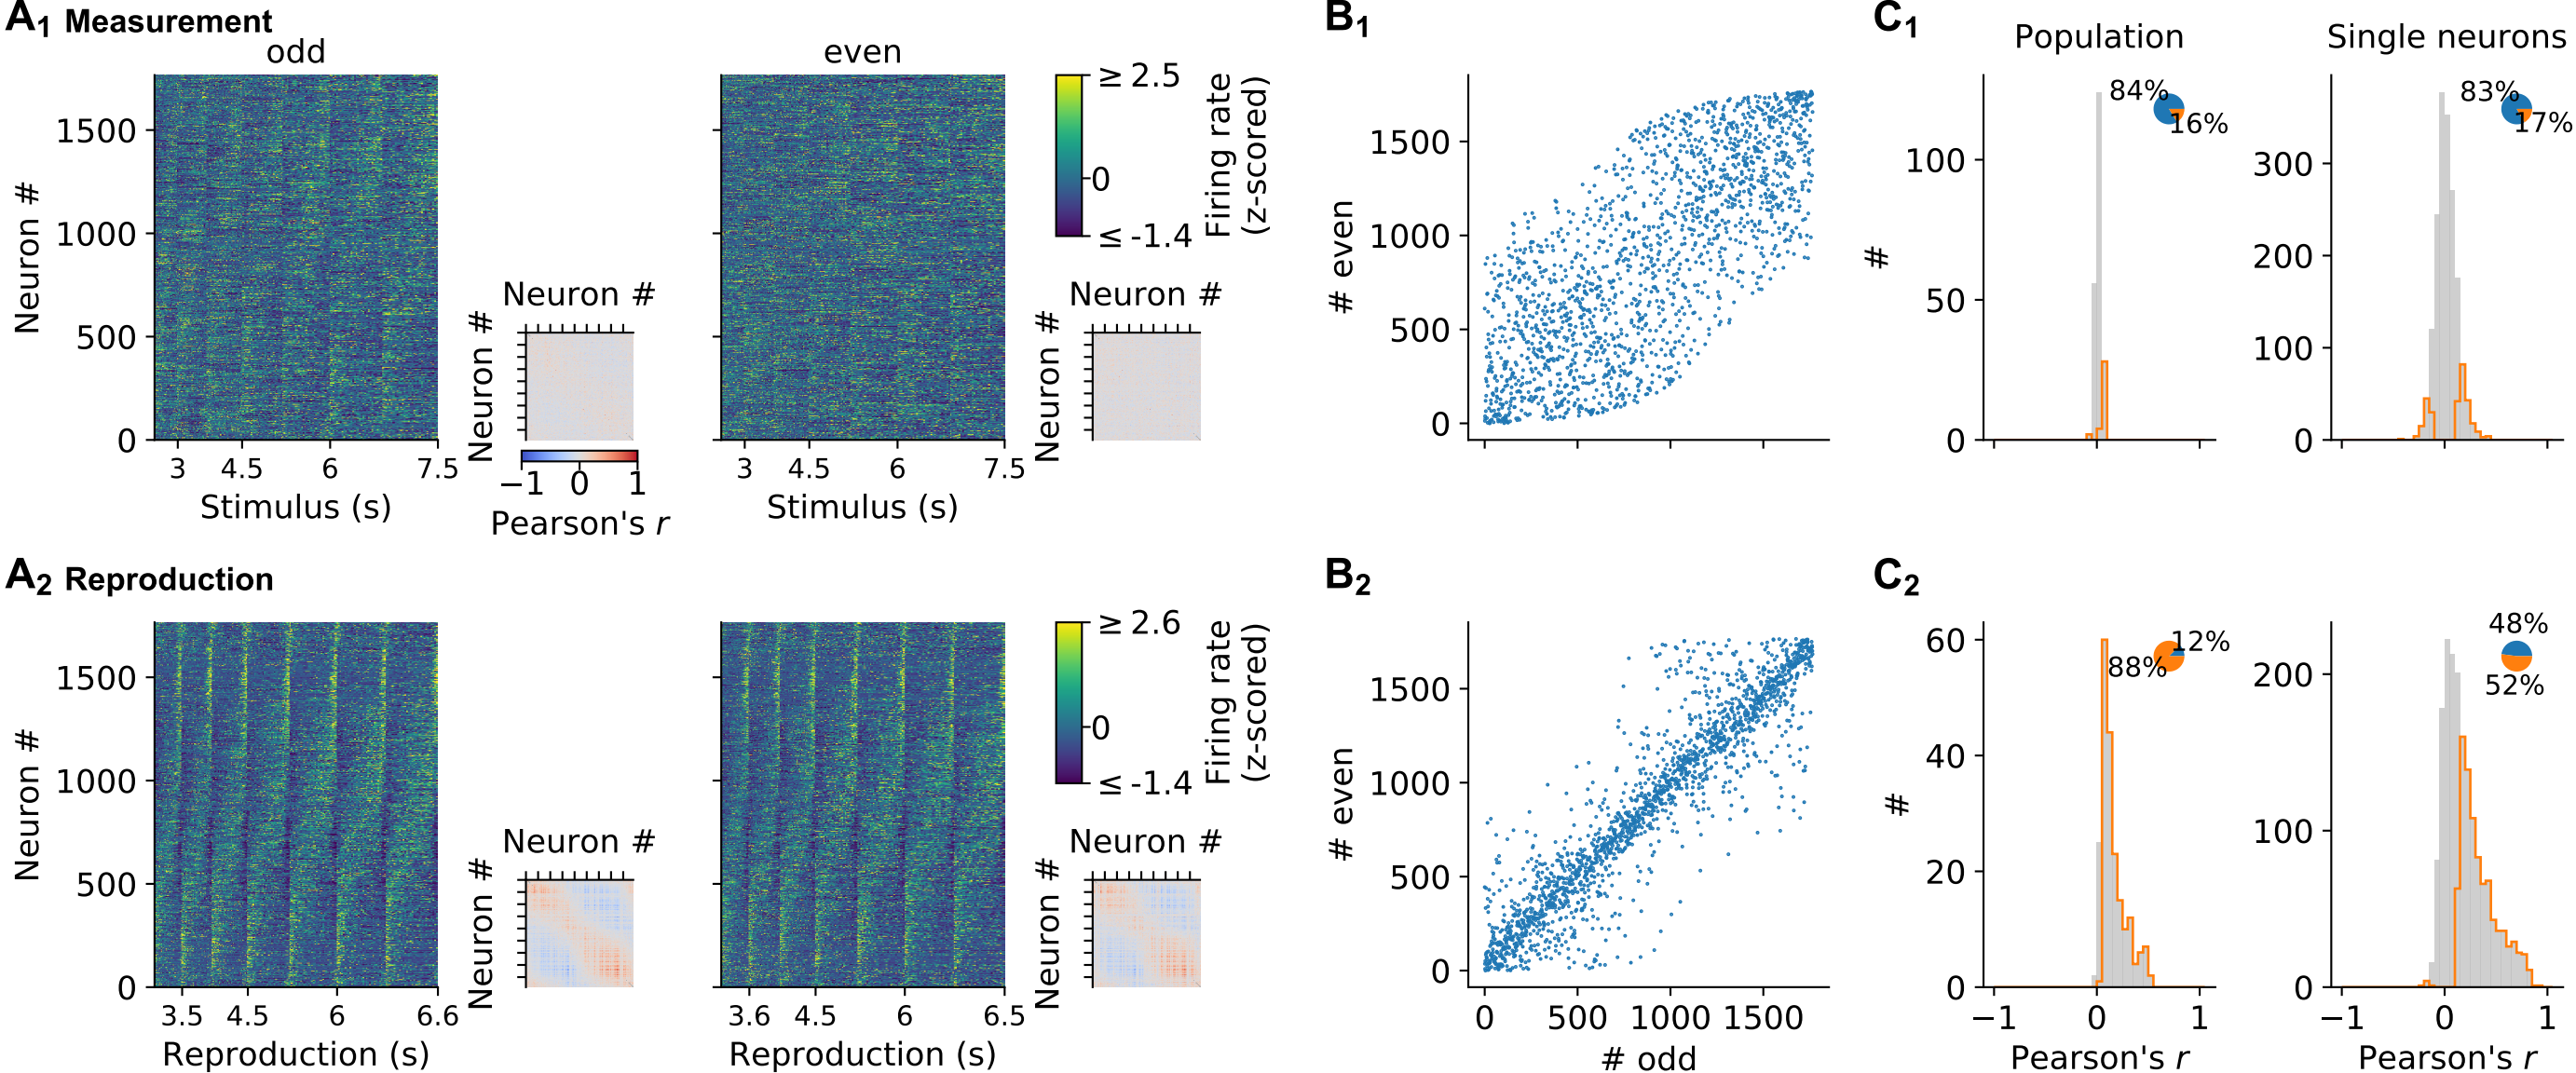

Supplement: supp [file elife-71612-supp-v1.zip]

**A Measurement**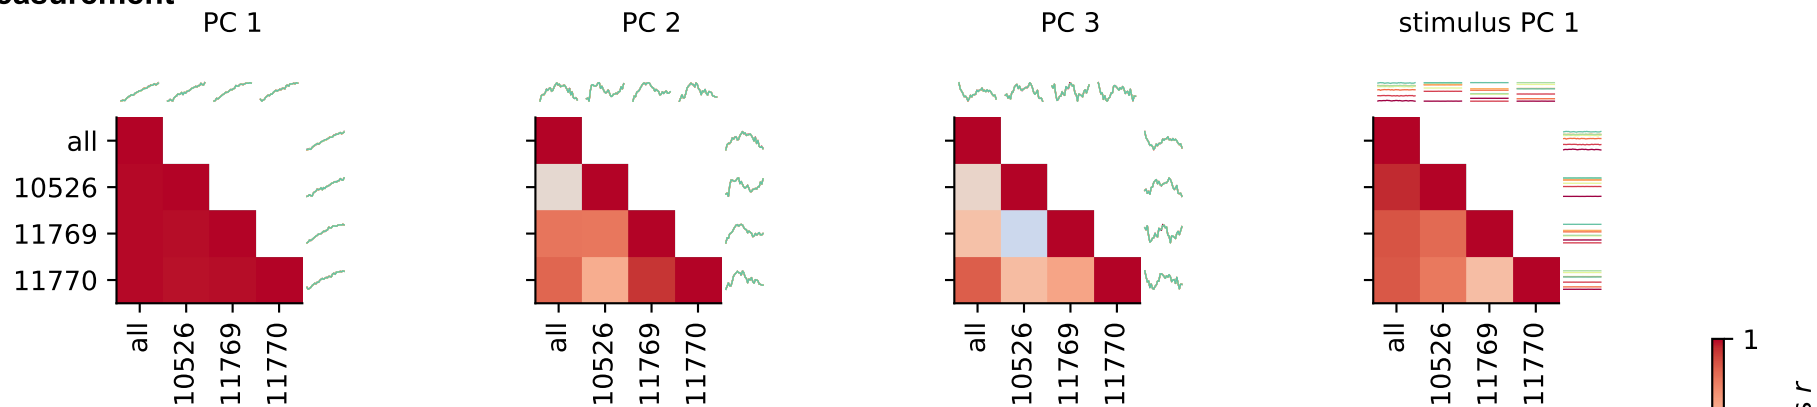**B Reproduction**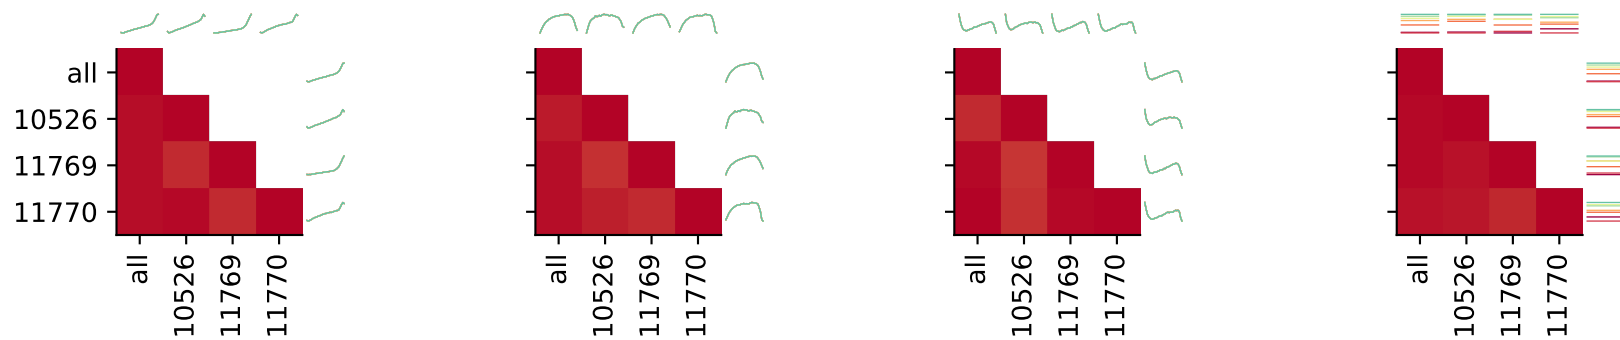

Supplement: supp [file elife-71612-supp-v1.zip]

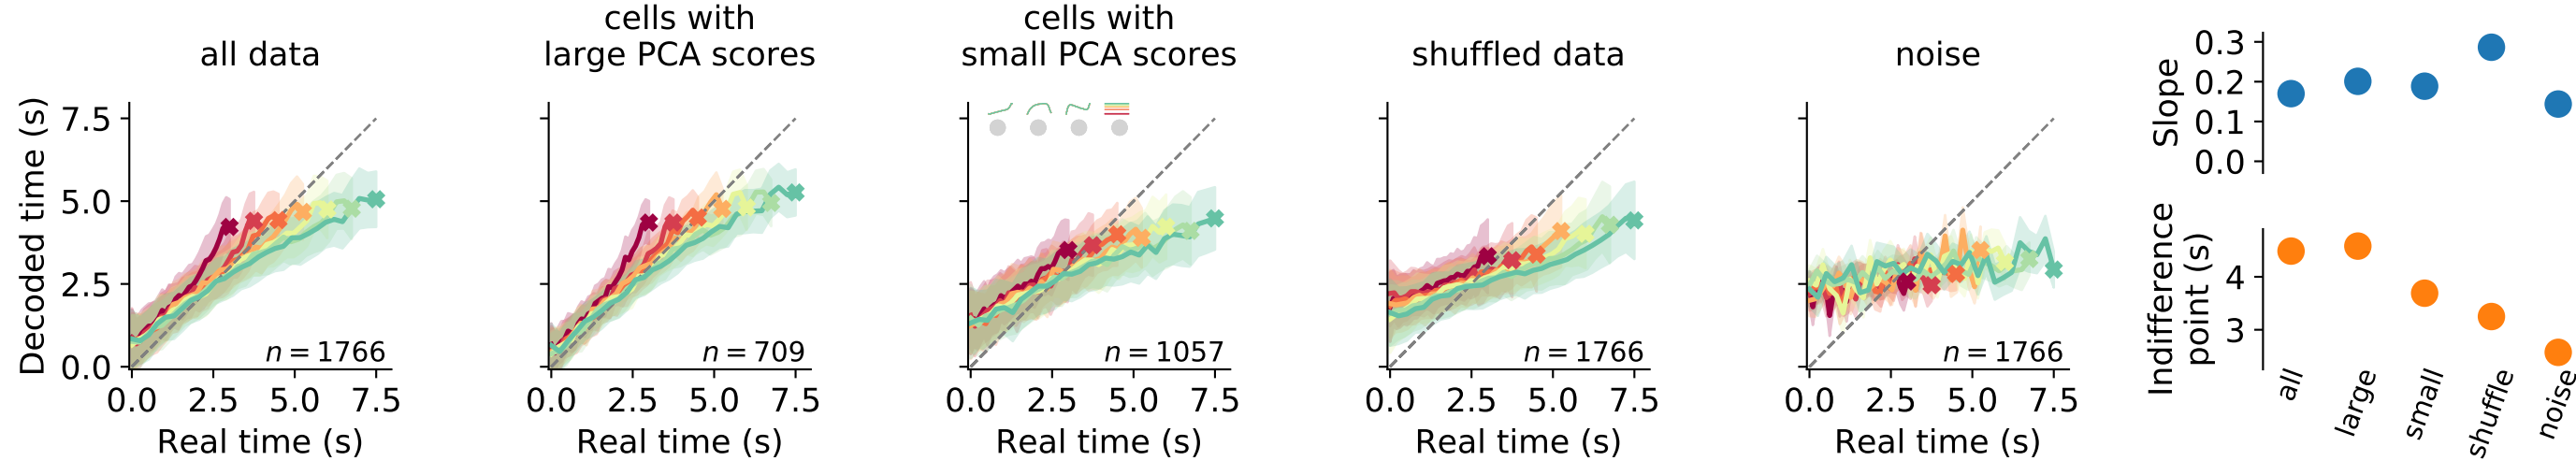

Supplement: supp [file elife-71612-supp-v1.zip]

Relative timing

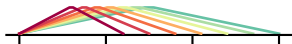

Absolute timing

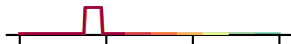

Absolute timing  
+ amplitude change

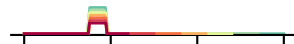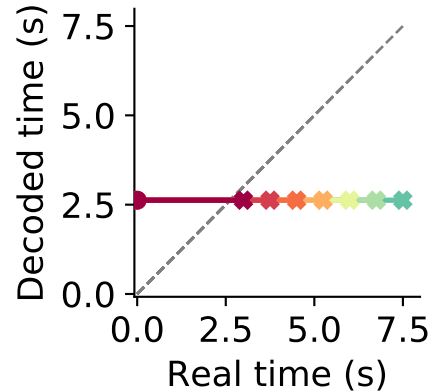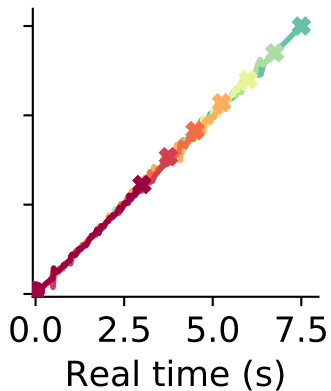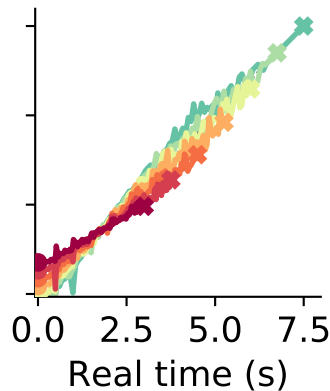

Supplement: supp [file elife-71612-supp-v1.zip]

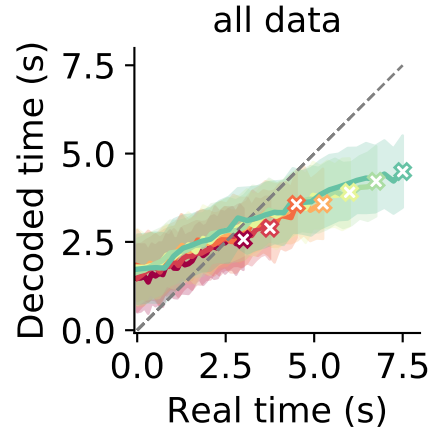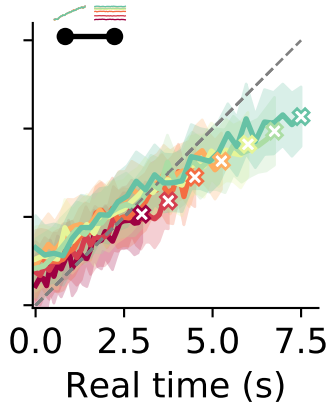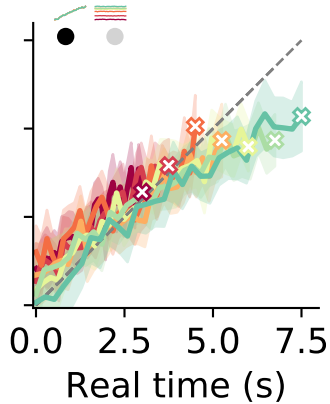

Supplement: supp [file elife-71612-supp-v1.zip]

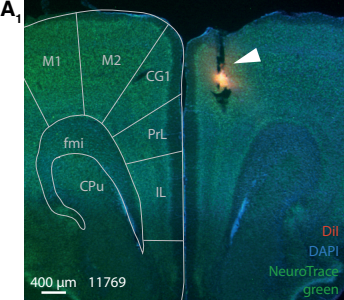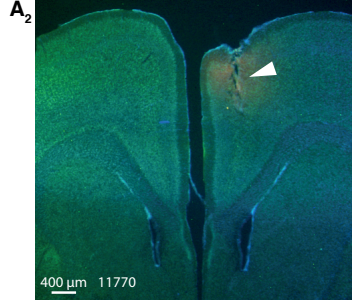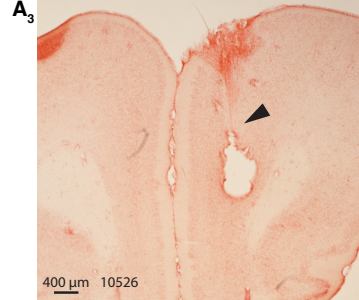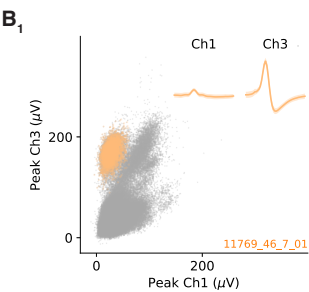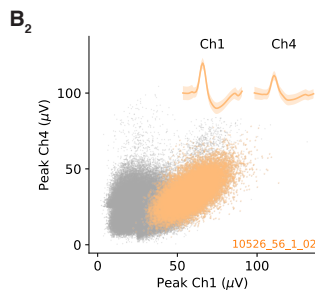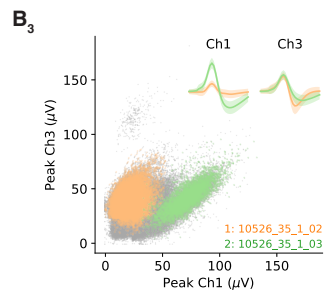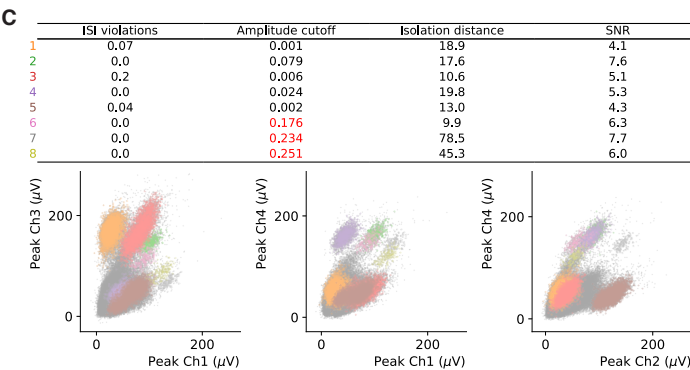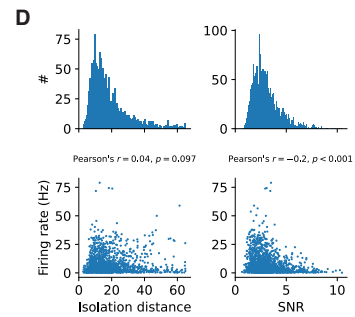

Supplement: supp [file elife-71612-supp-v1.zip]

## Measurement

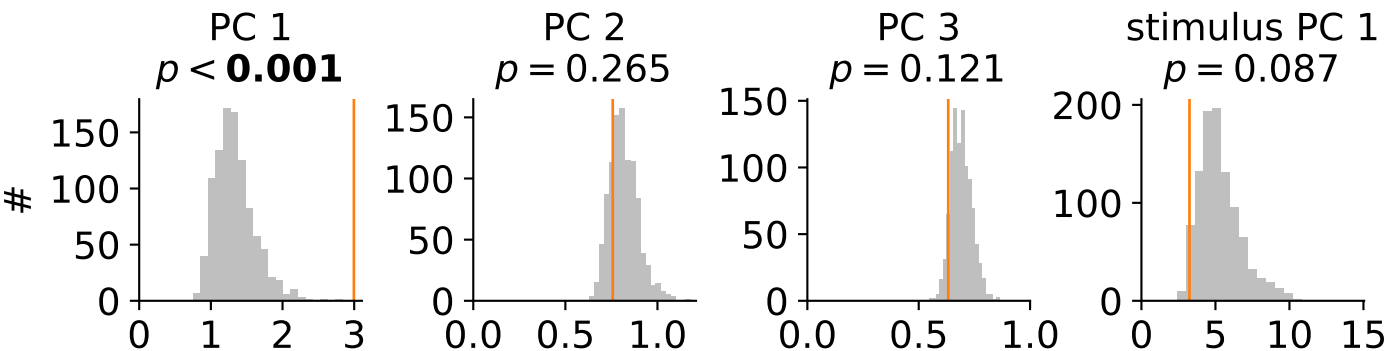

## Reproduction

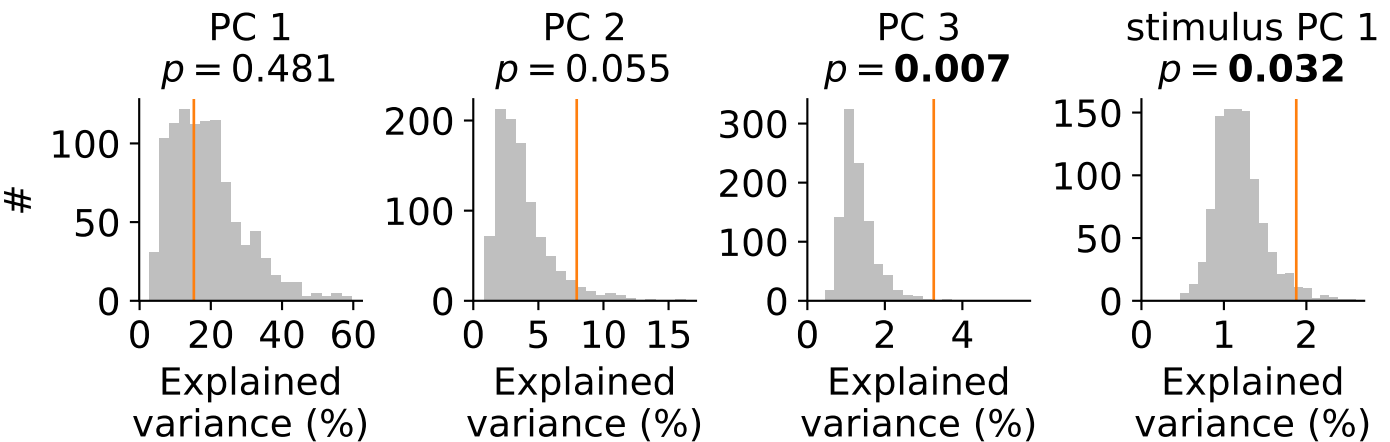

Supplement: supp [file elife-71612-supp-v1.zip]

## A Measurement

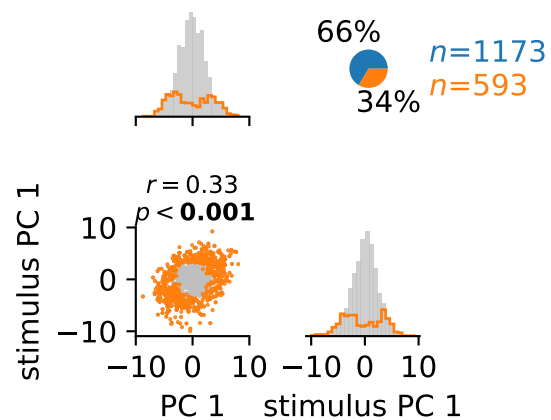

## B Reproduction

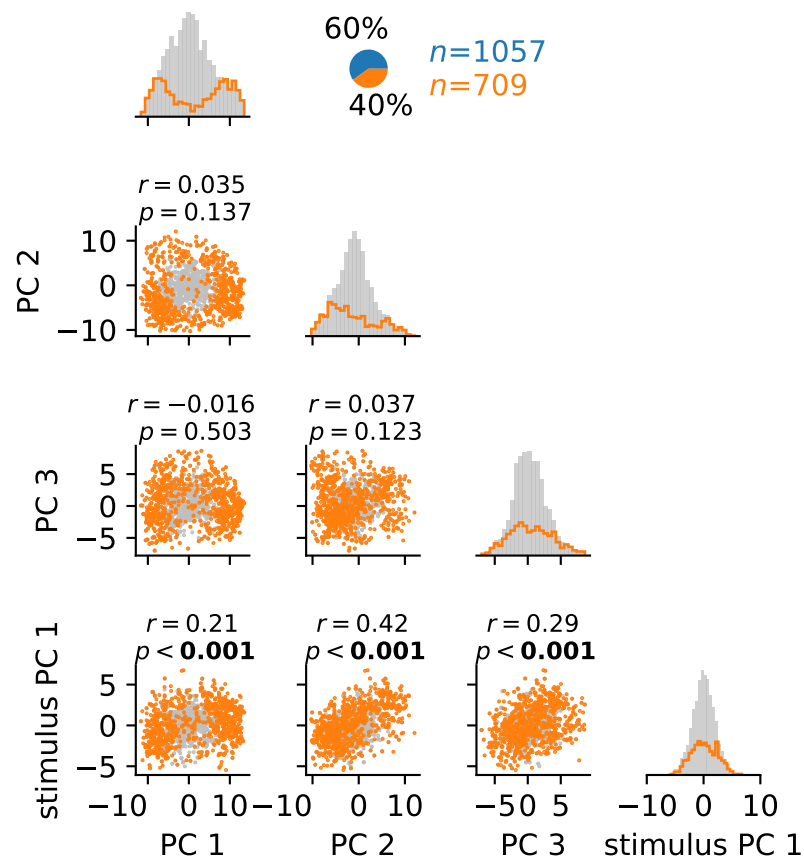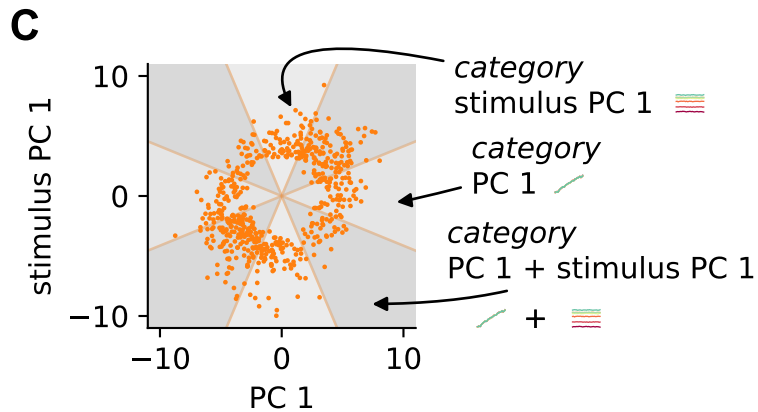

Supplement: supp [file elife-71612-supp-v1.zip]

## A Measurement

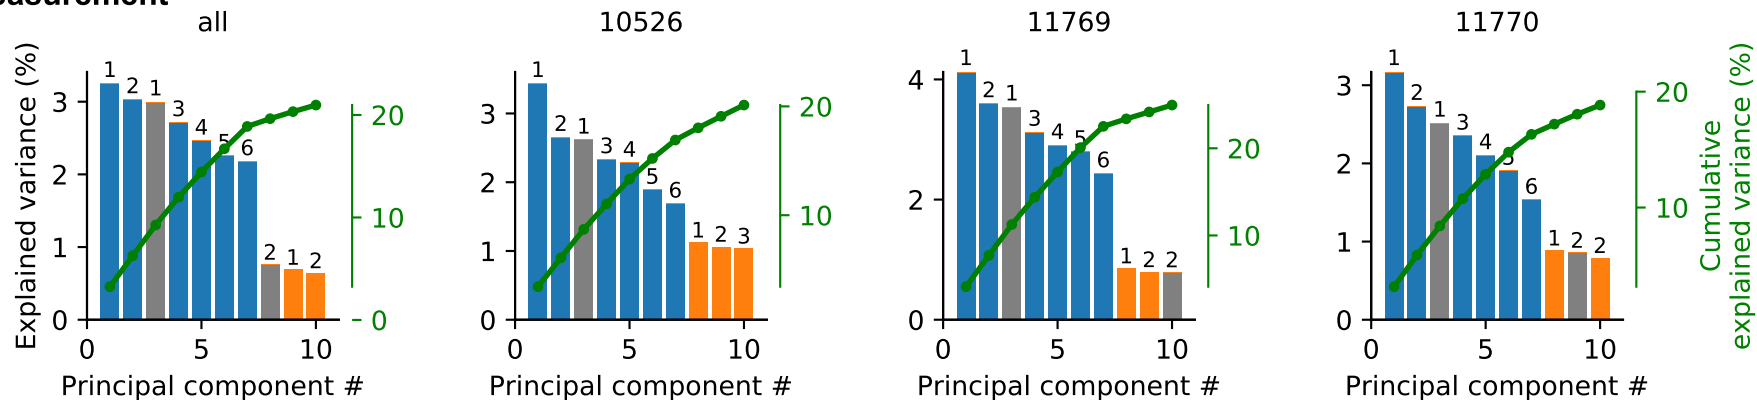

## B Reproduction

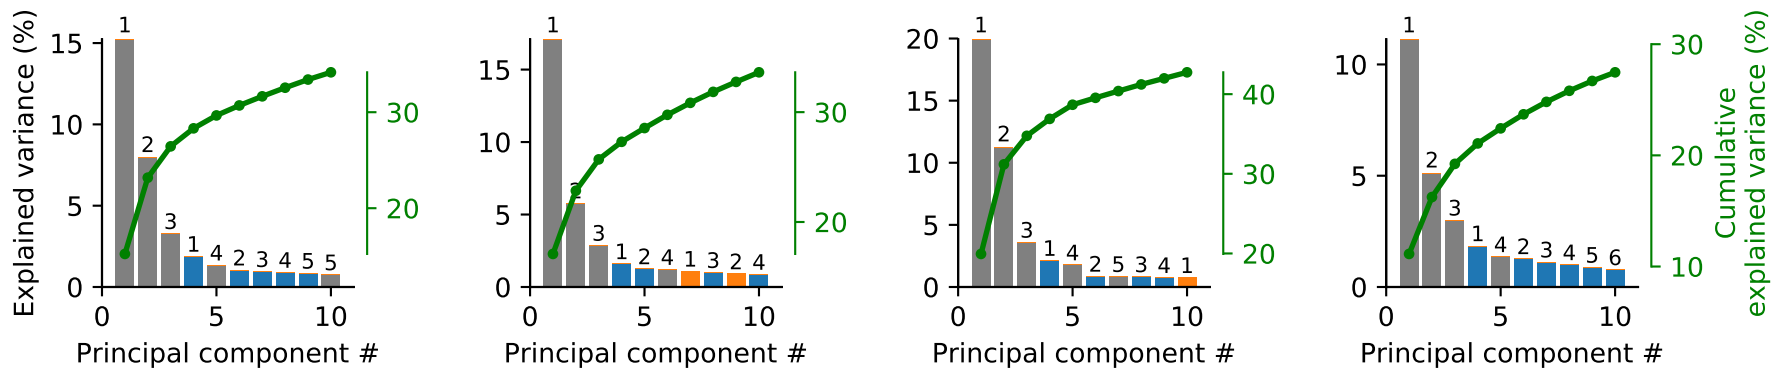

Supplement: supp [file elife-71612-supp-v1.zip]

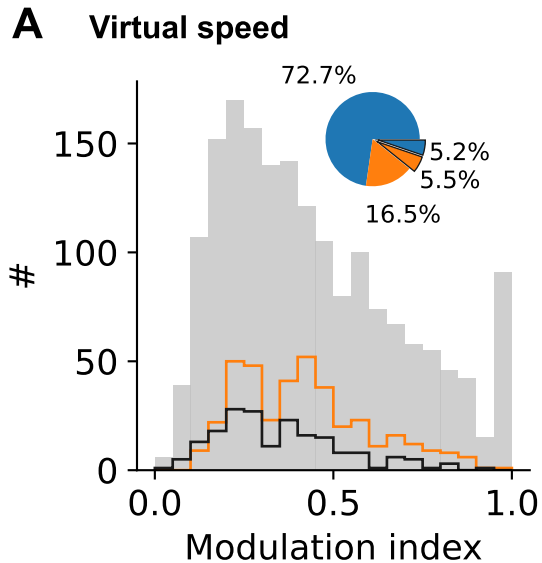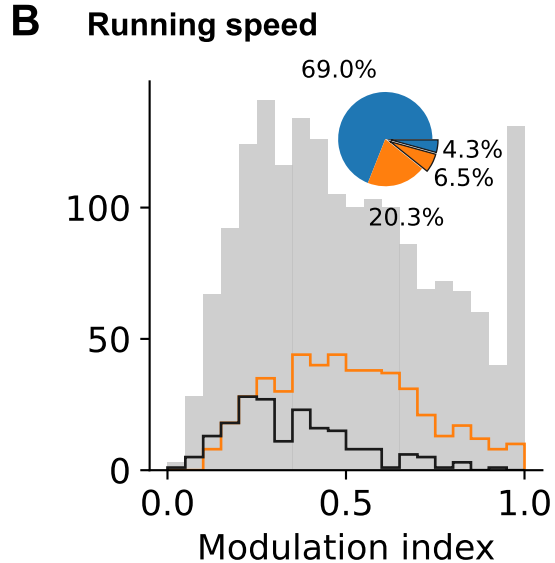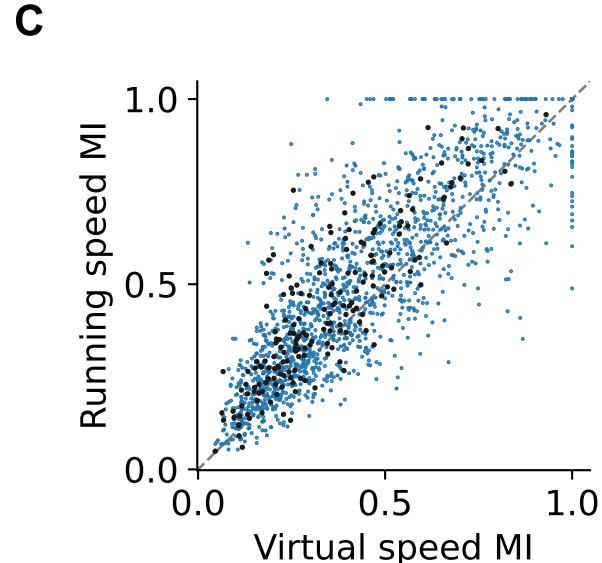

Supplement: supp [file elife-71612-supp-v1.zip]

## 11770

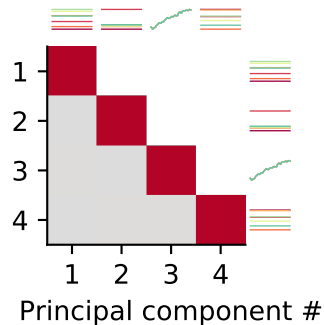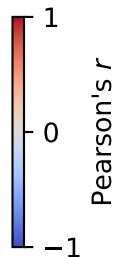

## 2 3

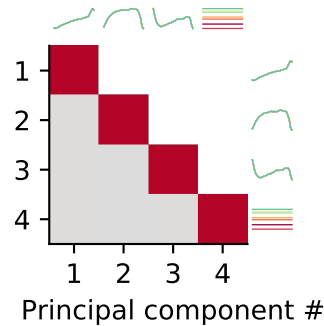

Supplement: supp [file elife-71612-supp-v1.zip]

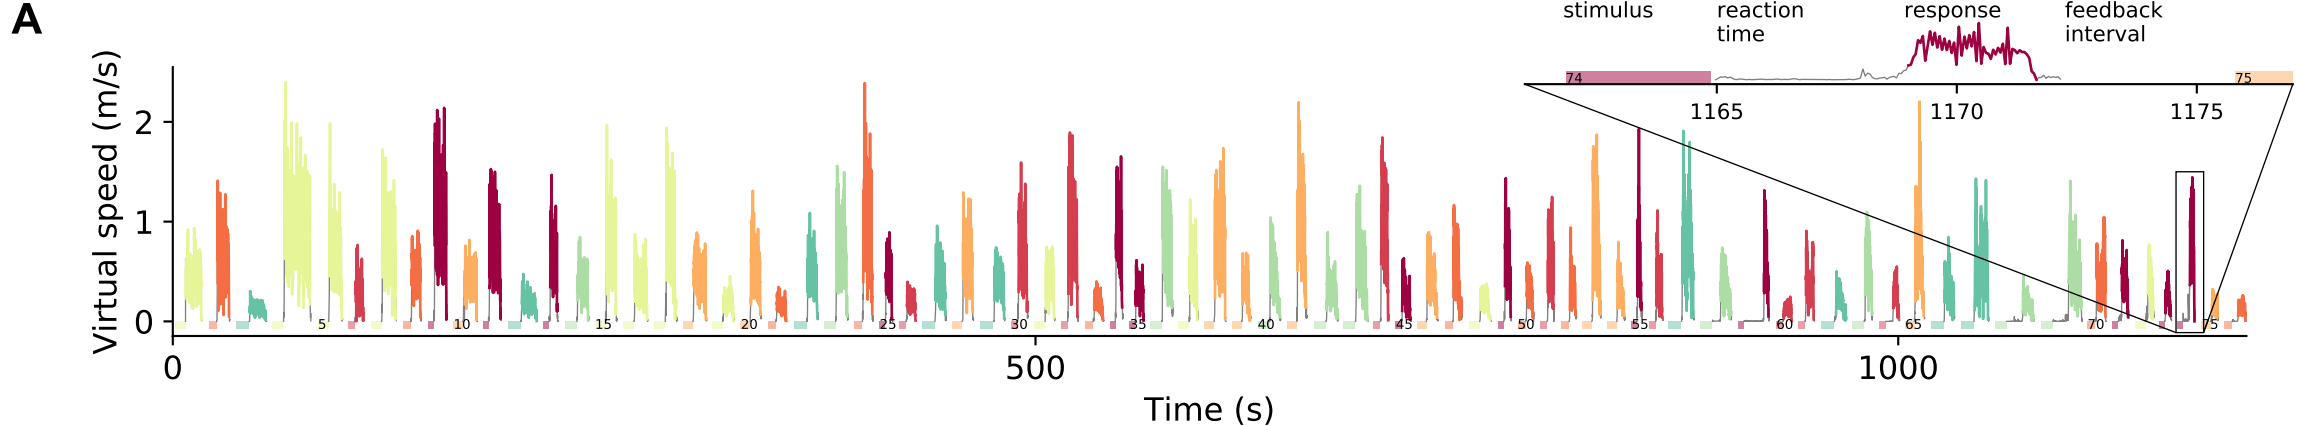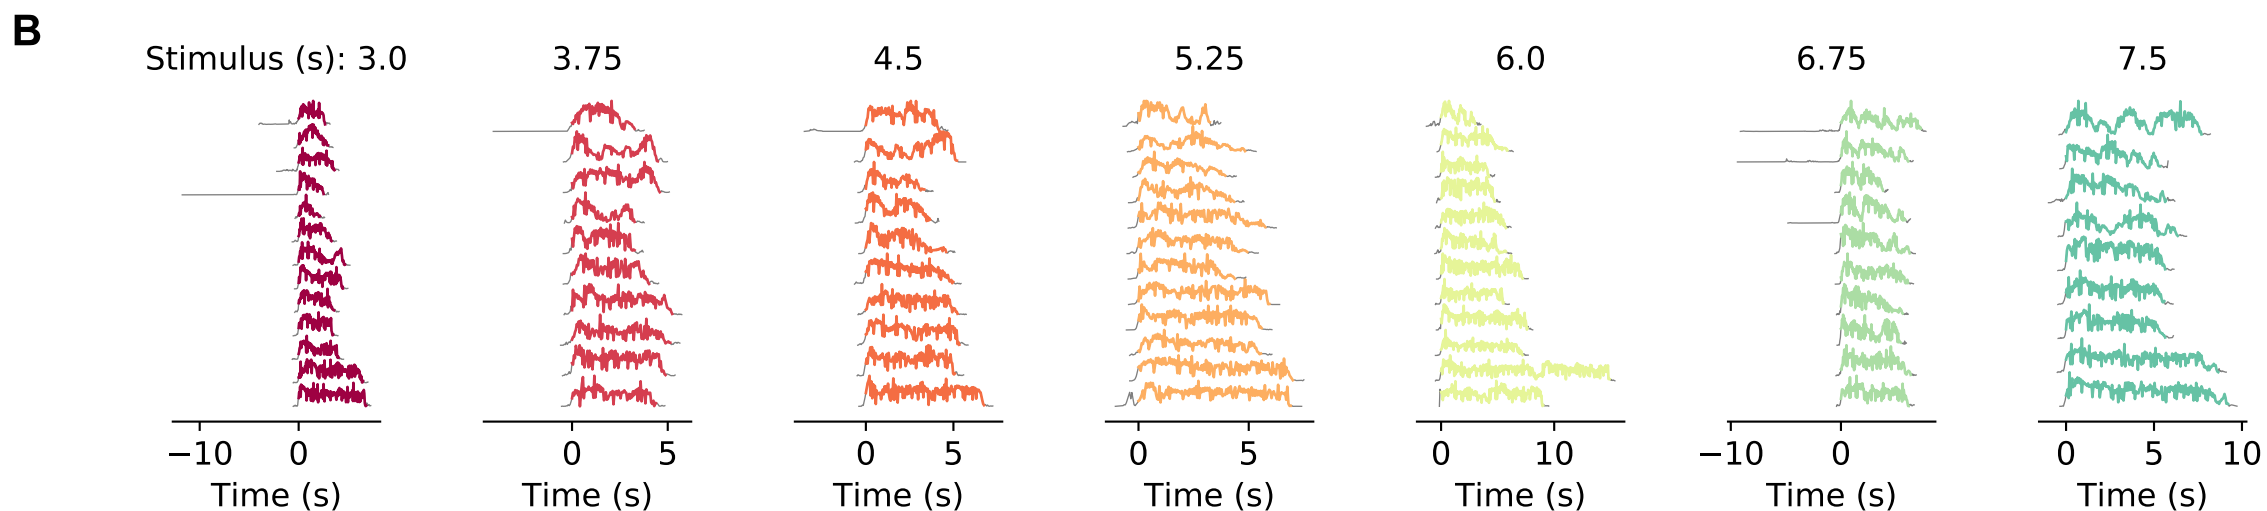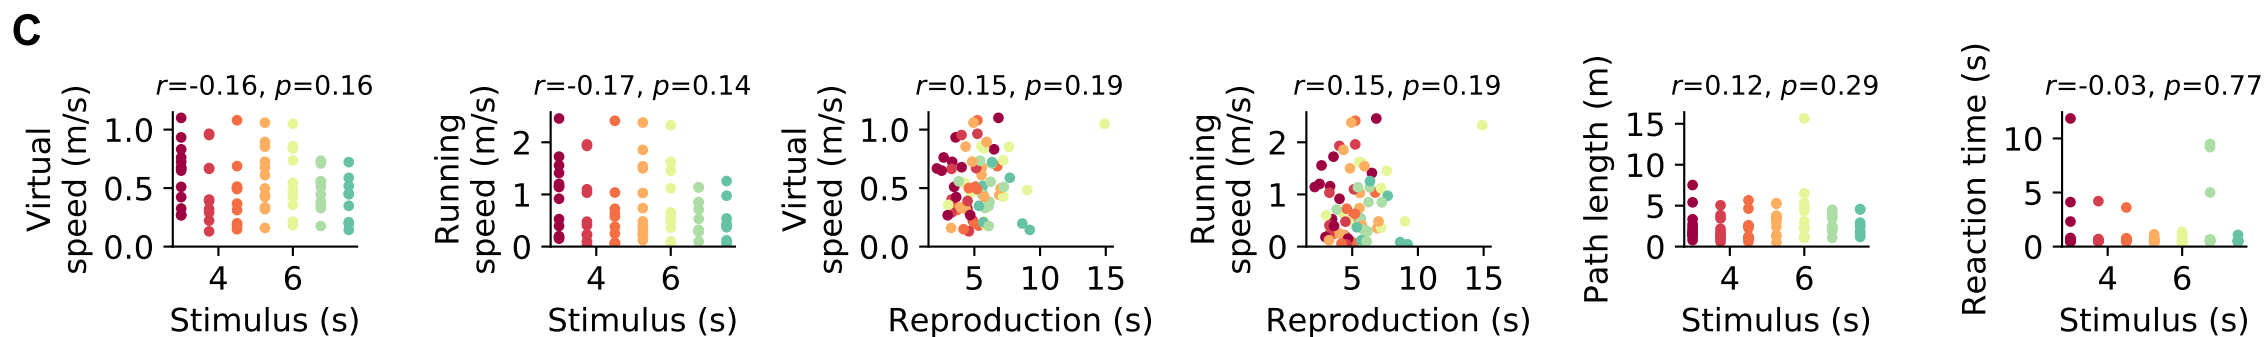

Supplement: supp [file elife-71612-supp-v1.zip]

## A Measurement

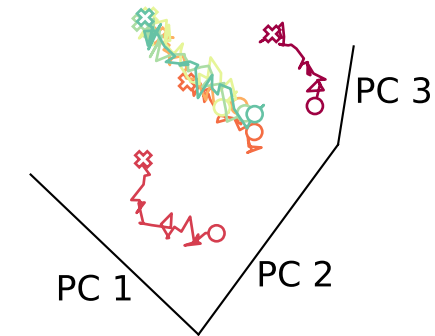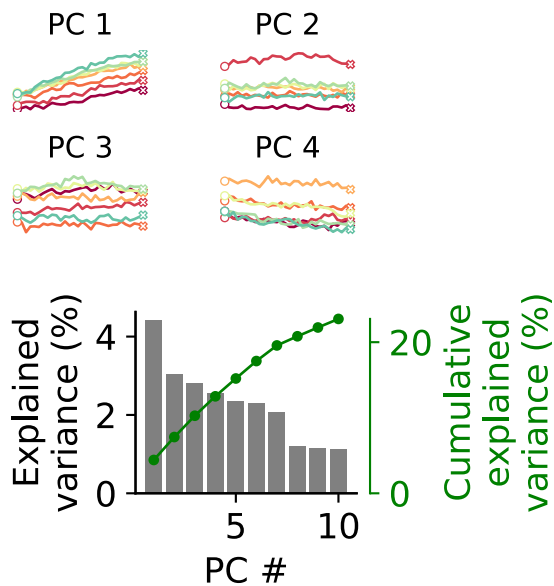

## B Reproduction

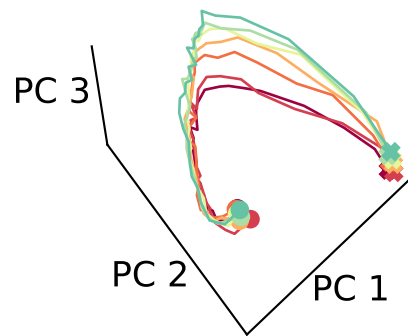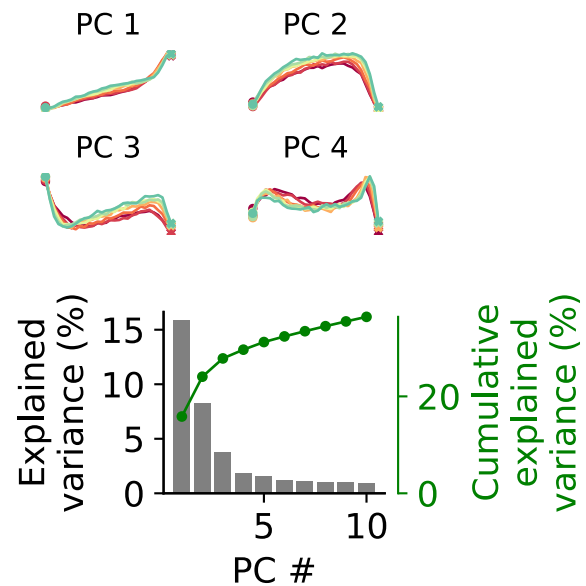

Supplement: supp [file elife-71612-supp-v1.zip]
